Immunome perturbation in arthritic patients who relapse upon withdrawal

**An immunome perturbation is present in juvenile idiopathic arthritis patients who are  
in remission and will relapse upon anti-TNF $\alpha$  withdrawal**

*Running title: Immunome perturbation in arthritic patients who relapse upon withdrawal*

Jing Yao Leong<sup>1</sup>, Phyllis Chen<sup>1</sup>, Joo Guan Yeo<sup>1,2</sup>, Fauziah Ally<sup>1</sup>, Camillus Chua<sup>1</sup>, Sharifah Nur Hazirah<sup>1</sup>, Su Li Poh<sup>1</sup>, Lu Pan<sup>1</sup>, Liyun Lai<sup>1</sup>, Elene Seck Choon Lee<sup>2</sup>, Loshinidevi D/O Thana Bathi<sup>1</sup>, PRCSG<sup>5</sup>, Thaschawee Arkachaisri<sup>1,2</sup>, Daniel J. Lovell<sup>3,4,5</sup>, Salvatore Albani<sup>1</sup>

**Author affiliations:**

<sup>1</sup>Translational Immunology Institute, Singhealth/Duke-NUS Academic Medical Centre, the Academia, 20 college road, Discovery tower level 8, Singapore 169856.

<sup>2</sup>Rheumatology and Immunology Service, KK Women's and Children's Hospital 100 Bukit Timah Road, Children's Tower level 3, Singapore 229899.

<sup>3</sup>Division of Rheumatology, Cincinnati Children's Hospital Medical Center, Cincinnati, Ohio, USA.

<sup>4</sup>Department of Paediatrics, University of Cincinnati College of Medicine Cincinnati, Ohio, USA.

<sup>5</sup>Pediatric Rheumatology Collaborative Study Group (PRCSG). Authors involved in clinical trial are listed in Acknowledgement and affiliations in online supplementary.

Immunome perturbation in arthritic patients who relapse upon withdrawal

**Corresponding Author:**

Jing Yao Leong, Ph.D.

Email: [leong.jing.yao@singhealth.com.sg](mailto:leong.jing.yao@singhealth.com.sg) ; [jyluke82@gmail.com](mailto:jyluke82@gmail.com)

Translational Immunology Institute, Singhealth/Duke-NUS Academic Medical Centre, the  
Academia, 20 college road, Discovery tower level 8, Singapore 169856.

Office Tel: +65 65767133; Fax: +65 62210975

**Word Count in main text: 2969/3000**

## Immunome perturbation in arthritic patients who relapse upon withdrawal

### ABSTRACT

**Objectives.** Biologics treatment with anti-TNF $\alpha$  is efficacious in juvenile idiopathic arthritic (JIA) patients. Despite displaying clinical inactivity during treatment, many patients will flare upon cessation of therapy. The inability to definitively discriminate patients who will relapse or continue to remain in remission after therapy withdrawal is currently a major unmet medical need. CD4 T cells have been implicated in active disease, yet how they contribute to disease persistence despite treatment is unknown.

**Methods.** We interrogated the circulatory reservoir of CD4<sup>+</sup> immune subsets at the single cell resolution with mass cytometry (CyToF) of JIA patients (n=20) who displayed continuous clinical inactivity for at least 6 months with anti-TNF $\alpha$ , and were subsequently withdrawn from therapy for 8 months, and scored as relapse or remission. These patients were examined prior to therapy withdrawal for putative subsets that could discriminate relapse from remission. We verified on a separate JIA cohort (n=16), the continued dysregulation of these circulatory subsets 8 months into therapy withdrawal. The immunological transcriptomic signature of CD4 memory in relapse/remission patients was examined with Nanostring.

**Results.** An inflammatory memory subset of CD3<sup>+</sup>CD4<sup>+</sup>CD45RA<sup>-</sup>TNF $\alpha$ <sup>+</sup> T cells deficient in immune checkpoints (PD1<sup>-</sup>CD152<sup>-</sup>) was present in relapse patients prior to therapy withdrawal. Transcriptomic profiling reveals divergence between relapse and remission patients in disease centric pathways involving (a) TCR activation, (b) apoptosis, (c) TNF $\alpha$ , (d) NF- $\kappa$ B and (e) MAPK signalling.

## Immunome perturbation in arthritic patients who relapse upon withdrawal

**Conclusions.** A unique discriminatory immunomic and transcriptomic signature is associated with relapse patients and may explain how relapse occurs.

**Keywords:** Juvenile idiopathic arthritis (JIA), mass cytometry (CyToF), anti-TNF $\alpha$ , relapse and therapy withdrawal.

## Immunome perturbation in arthritic patients who relapse upon withdrawal

### INTRODUCTION

Targeted therapy of juvenile idiopathic arthritis (JIA) with anti-TNF $\alpha$  biologics is efficacious with 70-80% responders and up to 50% achieving clinical inactivity on long term treatment[1, 2]. While sustained immune suppression through anti-TNF $\alpha$  is generally well tolerated, clinicians seek to achieve clinical remission off medication, to reduce risk of general infection, adverse events and financial burden[2]. Drug withdrawal in patients who attain clinical inactivity is complicated by the fact that 50-80% patients relapse upon therapy discontinuation[3, 4]. This phenomenon indicates that relapse patients who have attain clinical inactivity on medication, as defined by Wallace criteria, continue to experience subclinical inflammation and persistence of disease without overt presentation of clinical symptoms. Conversely, patients who achieve clinical remission off medication could be spared long-term drug effects. As such, there is a clinical need to address how discontinuing anti-TNF $\alpha$  therapy can be safely implemented, and a scientific need to understand the immune mechanisms related to relapse.

The etiology of JIA remains widely debated[5]. Unsupervised genome wide association studies and pathway analysis have highlighted the role of CD4 T-helper cell populations in autoimmune disease progression[6]. CD4 T cells were shown to infiltrate the synovium micro-environment[7-10], and corresponding pathogenic CD4 HLA-DR<sup>+</sup> T-effector and regulatory subsets possessing strong immune phenotypic and TCR correlation with synovial T cells have been found re-circulating in the blood during active inflammation[11, 12]. Furthermore, epigenetic histone modifications associated with enhancer functions has been detected in CD4 T cells of JIA patients[13]. Using network analysis of DNA CpG methylation sites in total CD4 T cells, we have previously demonstrated that T-cell activation pathways are associated with

## Immunome perturbation in arthritic patients who relapse upon withdrawal

clinical fate upon anti-TNF $\alpha$  withdrawal [14]. However, the identity of the specific pathogenic CD4 subset that maintains subclinical disease persistence remains elusive.

We have leveraged on the high dimensional single cell resolution capabilities of Cytometry by Time-of-Flight (CyToF) to uncover the CD4 T cell subset responsible for disease persistence. JIA patients who maintained clinical inactivity under anti-TNF $\alpha$  for at least 6 months, were subsequently withdrawn from therapy. These patients were rigorously scored for their disease progression across 8 months and their clinical outcome defined as relapse or remission. We interrogated the circulatory immunome of JIA patients prior to therapy withdrawal, and identified an inflammatory memory CD3<sup>+</sup>CD4<sup>+</sup>CD45RA<sup>-</sup>TNF $\alpha$ <sup>+</sup> T cell that is deficient for immune checkpoints (PD1<sup>-</sup>CD152<sup>-</sup>) in individuals who will relapse. Separately in patients who have flared after 8 months, this memory subset has extended towards TNF $\alpha$ <sup>+</sup>IL-6<sup>+</sup>. We were able to use the memory CD3<sup>+</sup>CD4<sup>+</sup>CD45RA<sup>-</sup>TNF $\alpha$ <sup>+</sup> subset to discriminate relapse from remission patients prior to withdrawal, and cross validated this dysregulation against a larger cohort of healthy paediatric controls. Finally, transcriptomic profiling of CD4 memory cells reveal disease centric pathways that reflect selective divergence among relapse and remission patients. This study underscores immunological differences at the core of the dichotomic clinical responses. These differences provide a framework for understanding the mechanisms of disease relapse upon drug withdrawal, thus providing a knowledge-based guidance for management while proposing some potential new targets for intervention.

Immunome perturbation in arthritic patients who relapse upon withdrawal

## MATERIALS AND METHODS

### Samples

Peripheral blood mononuclear cells (PBMCs) were obtained from polyarticular JIA patients recruited through the “*Determining Predictors of Safe Discontinuation of Anti-TNF treatment in JIA*” trial (ID: NCT00792233)[15]. Patients were treated with anti-TNF $\alpha$  biologics and shown to be in an inactive disease state for 6 months, were enrolled into the study. Clinical inactivity was defined by Wallace criteria[16]: (a) absence of active joints, (b) lack of fever, rash, serositis attributable to JIA, (c) no active uveitis, (d) within normal range of ESR unless attributable to JIA, (e) physician global disease activity of  $\leq 0.5$  Likert-like scale and (f) duration of morning stiffness  $\leq 15$  minutes. Upon enrollment, patients are withdrawn from anti-TNF $\alpha$  therapy and accessed through monthly clinical visits for a study period of 8 months. Clinical outcome is designated as relapse or remission depending on six core JIA parameters; (a) number of active joints, (b) number of joints with loss of motion, (c) medical doctor global assessment of current disease activity (Likert-like scale), (d) patient/parent global assessment of overall disease severity in prior week (Likert-like scale), (e) a validated measure of physical function (CHAQ) and (f) ESR. A patient was considered to be experiencing a relapse if there was  $\geq 30\%$  worsening in more than three of the six JIA core parameters, and with no more than one parameter improving by  $> 30\%$ . For remission individuals, they would have achieved  $\geq 14$  months of clinical inactivity from prior recruitment to study end. PBMCs were interrogated by CyToF from patients (n=20) prior to withdrawal were designated as ( $T_o$ ), and separately from another batch (n=16) at the end of 8 months after withdrawal were designated as ( $T_{end}$ ). Patient PBMCs (n=12) were also sorted for CD3<sup>+</sup>CD4<sup>+</sup>CD45RO<sup>+</sup>CD45RA<sup>-</sup> for Nanostring analysis. The demographics/medication history profile of JIA patients withdrawn from therapy and sample usage breakdown is as shown (**online supplementary Table S1**).

## Immunome perturbation in arthritic patients who relapse upon withdrawal

Age-matched healthy controls (n=69) were recruited through the Precision Rheumatology International Platform (PRIP) study conducted at the KK Women's and Children's Hospital (KKH). These controls have no indication of inflammation and PBMCs were isolated pre-operatively from patients scheduled for day surgeries. Healthy PBMCs were examined with CyToF (n=10), Nanostring (n=3) or age-matched strata cross validation for ROC curve (n=56).

Paired treatment naïve/post treatment JIA patients (n=4) were also recruited through the study “*A precision medicine approach to understand and predict responsiveness to therapy in human arthritis*” conducted in KKH for Nanostring analysis. These patients with active JIA were initially treatment naïve to anti-TNF $\alpha$ , and after a 6-month drug course exhibited treatment susceptibility determined by complete absence of active joints. The demographics/medication history profile of JIA patients is as shown (**online supplementary Table S2**).

Additional methodological details are available as supplementary information.



Immunome perturbation in arthritic patients who relapse upon withdrawal

## RESULTS

### **CD4<sup>+</sup>CD45RA<sup>-</sup>TNFα<sup>+</sup> T cells is present in JIA patients prior to relapse**

Dysregulated CD4 T cells are thought to contribute to JIA pathogenesis[7-12]. We interrogated the circulatory CD4 landscape of JIA patients (n=20) prior to therapy withdrawal to understand why certain individuals relapse. At this stage, the patients are clinically scored to be inactive for 6 months, thus patients who will relapse or remain in remission are clinically indistinguishable prior to withdrawal. We assessed the PBMCs with a CyToF panel consisting of 31 functional, 6 lineage markers (**online supplementary Table S3**) and CD45 barcoding to facilitate pooling of individuals[17]. Batch variability in staining was monitored through an internal biological control (**online supplementary Figure S1**). The debarcoded CD3<sup>+</sup>CD4<sup>+</sup> T cells were exported, normalized for cell events and the 31 markers dimensionally reduced with MarVis onto a bivariate X-Y axis through t-SNE (**online supplementary Figure S2**). Clustering with k-means segregated the CD4 cells into distinct nodes (**Figure 1A**), and we detected an enrichment ( $p < 0.01$ ) in node 22 for patients who will relapse, that represents CD4<sup>+</sup>CD45RA<sup>-</sup>TNFα<sup>+</sup>IFNγ<sup>-</sup>CD152<sup>-</sup>PD1<sup>-</sup> T cells (**Figure 1A-C**). To ensure the results are not due to clustering artefacts, we manually gated the pre-clustering FCS files (**Figure 1D**, gating strategy in **online supplementary Figure S3**), and determined significant ( $p < 0.05$ ) up-regulation in CD4<sup>+</sup>CD45RA<sup>-</sup> memory subsets that was restricted within the TNFα<sup>+</sup> compartment. In particular, relapse patients were enriched for CD4<sup>+</sup>CD45RA<sup>-</sup>TNFα<sup>+</sup> T cells which were absent for IFNγ expression, and were notably deficient in immune checkpoints (PD1/CD152). We investigated the relationship of the dysregulated T effectors and immune checkpoint expression within the memory compartment (**Figure 1E**). There was a stronger positive correlation of CD45RA<sup>-</sup>TNFα<sup>+</sup> with CD45RA<sup>-</sup>CD152<sup>-</sup>PD1<sup>-</sup> ( $r = 0.8257$ ) as opposed to CD45RA<sup>-</sup>CD152<sup>+</sup>PD1<sup>+</sup> ( $r = 0.5987$ ) cells across the patients. The percentage of TNFα<sup>+</sup> cells

## Immunome perturbation in arthritic patients who relapse upon withdrawal

was significantly higher ( $p < 0.0001$ ) in  $CD45RA^{\text{low}}CD152^{\text{low}}PD1^{\text{low}}$  cells (**Figure 1F**). While relapse patients showed a perceptible increase in T-effectors in the absence  $CD152/PD1$ , there was a marked drop to up-regulate  $CD152/PD1$  as compared with remission patients (**Figure 1G-H**).

## **CD4<sup>+</sup>TNFα<sup>+</sup> healthy landscape unveils subclinical T-effector diversification in relapse patients**

To validate the findings above and to investigate for the possibility of disease centric  $CD4^+$  cellular subsets that are masked by comparing JIA relapse/remission individuals, we included age-matched paediatric healthy controls.  $CD4^+TNF\alpha^+$  T cells from JIA relapse/remission ( $n=20$ ) prior to withdrawal or healthy individuals ( $n=10$ ) were compared to further delineate key differences within the T effector compartment. JIA patients who will relapse were enriched ( $p < 0.05$ ) for node 17 against remission individuals (**Figure 2A-B**), and additionally for nodes 17,13 and 18 against healthy controls ( $p < 0.05$ ) (**Figure 2C-D**). Node 17 reaffirms relapse individuals are enriched for  $CD4^+CD45RA^{\text{low}}TNF\alpha^+IFN\gamma^{\text{low}}CD152^{\text{low}}PD1^{\text{low}}$  T cells (**Figure 2E-F**) as compared with remission or healthy individuals. Additionally node 13 (**Figure 2E**) represents  $CD4^+CD45RA^{\text{low}}TNF\alpha^+IFN\gamma^{\text{low}}CD152^{\text{low}}PD1^{\text{low}}$  T cells that are also  $IL-6^+$ . Supervised gating (**Figure 2G** gating strategy in **online supplementary Figure S3**) validates that relapse individuals are enriched ( $p < 0.001$ ) with  $CD4^+CD45RA^{\text{low}}TNF\alpha^+IL-6^+$  as compared with healthy individuals. The intensity of  $TNF\alpha$  is significantly higher ( $p < 0.0001$ ) in  $CD45RA^{\text{low}}IL-6^+$  as opposed to  $IL-6^{\text{low}}$  cells (**Figure 2H**), and relapse individuals has higher fold increase ( $p < 0.05$ ) in  $TNF\alpha$  in  $CD45RA^{\text{low}}IL-6^+$  cells as compared with remission or healthy individuals.

Immunome perturbation in arthritic patients who relapse upon withdrawal

### **Overt T-effector diversification during flare manifestation and quiescence in stable remission**

We have observed the presence of CD4 memory T cells in patients prior to relapse. To examine this phenomenon further, we interrogated the CD4 landscape of an independent batch of JIA individuals (n=16) withdrawn from therapy for 8 months, that either developed flare or remained in stable remission. Relapse (in flare) patients exhibited the emergence of a previously subclinical CD4<sup>+</sup>CD45RA<sup>-</sup>TNFA<sup>+</sup>IL-6<sup>+</sup> subset (**Figure 3A-D**, node 7) as compared with patients who remained in remission after 8 months of withdrawal. To determine the state of immunological quiescence in remission (T<sub>0</sub>: prior withdrawal, T<sub>end</sub>: 8 months withdrawal) patients, we gated for the relevant dysregulated CD4<sup>+</sup>CD45RA<sup>-</sup>TNFA<sup>+</sup> subsets and found no difference as compared with healthy individuals (**Figure 3E**). The CD4 landscape of remission patients (T<sub>0</sub>/T<sub>end</sub>) as compared with healthy individuals revealed mostly similar profiles (**Figure 3F**) except for node 17 and 1 enriched in remission T<sub>0</sub> or T<sub>end</sub> patients respectively. Both nodes were absent for TNFA, with node 17 exhibiting CD45RA<sup>+</sup> and node 1 expressing CD45RA<sup>-/+</sup>CXCR3<sup>+</sup>CCR6<sup>+</sup> phenotype (**Figure 3G**).

### **Corresponding increase of memory Tregs and CD45RA<sup>-</sup>TNFA<sup>+</sup> prior to relapse**

As Tregs have been previously implicated in JIA pathogenesis[10, 12, 18-20], we examined their role in JIA patients prior/after therapy withdrawal (**Figure 4A-B**, gating strategy in **online supplementary Figure S3**). While no differential total Treg frequencies was detected, we observed higher levels of CD45RA<sup>-</sup>Treg (p < 0.0001) in JIA patients prior to relapse. We further verified this with t-SNE analysis of Tregs from relapse/remission patients prior to withdrawal, and determined an enrichment for CD45RA<sup>-</sup>CD152<sup>+</sup>CD127<sup>-</sup>Tregs for relapse individuals (**Figure 4C-D**). Whilst no correlation (r=0.1532) with total Tregs was observed

Immunome perturbation in arthritic patients who relapse upon withdrawal

for CD45RA<sup>-</sup>TNF $\alpha$ <sup>+</sup> cells (**Figure 4E**), there was a positive correlation ( $r=0.6017$ ) with CD45RA<sup>-</sup>Treg.

### **Transcriptomic divergence in disease centric pathways that persists despite therapy**

We have previously shown that JIA patients who developed active disease upon therapy withdrawal have stable epigenetic DNA CpG modifications in CD4 T cells that predisposed towards T cell activation and TCR signaling[14]. We wanted to investigate if CD4 memory T cells from JIA relapse/remission patients were differential in transcriptomic profile when their TCR is activated. We sorted for CD3<sup>+</sup>CD4<sup>+</sup>CD45RA<sup>-</sup>CD45RO<sup>+</sup> T cells (**online supplementary Figure S4**), stimulated 24hrs with anti-CD3/CD28, and profiled 579 immunological genes through Nanostring. Functional gene enrichment analysis (DAVID) of JIA relapse (n=6) or remission (n=6) patients versus healthy individuals (n=3) identified 5 common disease centric pathways that persisted from prior to after withdrawal of therapy (**online supplementary Figure S5 and Table S4-5**). Dysregulation in *UBE2L3*, *IL-6*, *STAT4*, *TYK2*, *TNFAIP3* and *PTPN2* were found in both relapse and remission individuals, have been previously associated with JIA[21, 22]. We examined through Cytoscape and Reactome database for the gene associations involved in the 5 pathways (**Figure 5A-E**), (a) TCR activation, (b) apoptosis, (c) TNF $\alpha$ , (d) NF- $\kappa$ B and (e) MAPK signaling, and found considerable overlap between relapse and remission individuals. This overlap of pathways in relapse/remission JIA patients may arise from their shared susceptibility to clinical control with continued anti-TNF $\alpha$  therapy. Indeed, we observe similar disease centric pathway persistence in a separate cohort of JIA patient (n=4) that are responsive to anti-TNF $\alpha$  therapy, from the point of pre (active) till post-treatment (recent clinical inactivity) (**online supplementary Figure S6-7 and Table S3 and 6**). Despite this overlap, we detected selective divergence within these pathways (**Figure 5A-E**), with remission individuals

## Immunome perturbation in arthritic patients who relapse upon withdrawal

expressing higher levels of *FYN*, *TNFRSF9*, *CASPI*, *TRAF1* and *IKBKE* which are involved in termination or resolution of these pathways[23-32].

### **CD4<sup>+</sup>CD45RA<sup>-</sup>TNFα<sup>+</sup> discriminates clinical fate prior to withdrawal of therapy**

We explored whether disease or remission duration of JIA patients (n=39) prior to study enrolment, could differentiate clinical fate, and found no significant difference between relapse or remission JIA patients (**Figure 6A-D**). As we have shown that an inflammatory memory subset of CD4<sup>+</sup>CD45RA<sup>-</sup>TNFα<sup>+</sup> is present in relapse individuals prior to therapy withdrawal, we tested whether this could afford for discrimination in clinical fate. There was a significant difference (p < 0.001) in the ratio of CD45RA<sup>-</sup>TNFα<sup>+</sup>/CD45RA<sup>+</sup>TNFα<sup>+</sup> cells in relapse as compared to remission individuals prior to therapy withdrawal, allowing for a ROC curve of AUC=0.9394 (**Figure 6E-F**). As age could be a serious potential cofounder for immunological memory, we determined that in the relevant age groups (7-14 yrs), there was no significant difference in CD45RA<sup>-</sup> or CD45RA<sup>-</sup>TNFα<sup>+</sup> cells among healthy individuals (n=56) (**Figure 6G-H**). Relapse individuals had significantly higher CD45RA<sup>-</sup>TNFα<sup>+</sup> cells as compared across all the relevant age groups in healthy individuals (**Figure 6H**).

## Immunome perturbation in arthritic patients who relapse upon withdrawal

### CONCLUSIONS

With a large proportion of JIA patients achieving clinical inactivity as a result of efficacious treatment with anti-TNF $\alpha$  biologics[2], it becomes increasingly pertinent to address the lack of definitive withdrawal guidelines. Here, we investigated with CyToF the heterogeneous CD4 landscape of patients who achieved clinical inactivity prior to therapy withdrawal. We have identified for the first time an inflammatory CD4 memory subset (CD3<sup>+</sup>CD4<sup>+</sup>CD45RA<sup>-</sup>TNF $\alpha$ <sup>+</sup>) that remains elevated in JIA patients prior to relapse, and could notably discriminate clinical fate prior to therapy withdrawal (AUC=0.939).

Remarkably the presence of this inflammatory subset despite therapy, was associated with a deficit in immune checkpoint (PD1<sup>-</sup>CD152<sup>-</sup>). This is consistent with the phenomenon of irAEs (rheumatic immune-related adverse events), where the application of immune checkpoint therapy (anti-PD1/anti-CD152) in cancer results in rheumatic diseases[33]. The presence of this inflammatory subset was further verified when we separately compared relapse against healthy non-JIA individuals. The CD4<sup>+</sup>TNF $\alpha$ <sup>+</sup> healthy landscape helped reveal the subclinical diversification of T-effector mechanisms in relapse individuals, with the emergence of CD3<sup>+</sup>CD4<sup>+</sup>CD45RA<sup>-</sup>TNF $\alpha$ <sup>+</sup>PD1<sup>-</sup>CD152<sup>-</sup> T cells that are IL-6<sup>+</sup>. Particularly, CD4<sup>+</sup>CD45RA<sup>-</sup> T cells that are IL-6<sup>+</sup> express higher levels of TNF $\alpha$ . Recently, a case series of 3 patients with cancer and developed severe polyarthritis following immune blockade therapy, reported successful treatment with tocilizumab (anti-IL-6)[34]. This reflects a level of commonality between inflammatory and disease resolution mechanisms operating in autoimmune disorders and cancer.

## Immunome perturbation in arthritic patients who relapse upon withdrawal

We further examined a separate cohort of JIA patients that developed flare or remained in remission 8 months into withdrawal of therapy, and verified the overt presence of T-effector diversification ( $CD45RA^-TNF\alpha^+IL-6^+$ ) during flare. Whereas in patients that continue to remain in remission 8 months into withdrawal, there was no differential display of any  $CD45RA^-TNF\alpha^+$  subsets as compared to the healthy CD4 landscape, though a  $CD4^+CXCR3^+CCR6^+$  subset was detected. It remains speculative if the  $CD4^+CXCR3^+CCR6^+$  subset seen in remission patients is an early disease driven subset or side-effect of therapy as it extends beyond the scope of the study, and will require longer follow-up duration. In rheumatoid arthritis, the  $CD4^+CXCR3^+CCR6^+$  subset is known express high levels of  $IFN\gamma$  with poor secretion of IL-17A[35], though we did not observe any associated cytokine profile in our remission patients.

In patients prior to relapse, the prevalence of the inflammatory  $CD4^+CD45RA^-TNF\alpha^+$  T cells within the T-effector compartment is parallel by a corresponding increase in  $CD4^+CD45RA^-CD152^+$  Tregs in the regulatory arm. This suggests there is a compensatory regulatory response towards subclinical inflammation prior to relapse, though it remains to be seen whether the suppression suffices or is defective. Others have shown that synovium T-effectors are resistant to Treg suppression[19], which can be alleviated in JIA patients undergoing anti-TNF $\alpha$  therapy[36]. Though it is noted that in a subset of patients, in-vitro blockade of IL-6 $^+$  additionally alleviated T-effector resistance to Treg suppression[36].

Transcriptomic profiling of immunological genes in response to TCR signaling reveals 5 common disease centric pathways (TCR activation, apoptosis, TNF $\alpha$ , NF-kB and MAPK signaling) in relapse/remission patients as compared to healthy controls. Separately the same dysregulated pathways were also detected in JIA patients that are treatment naïve and later

## Immunome perturbation in arthritic patients who relapse upon withdrawal

responsive to anti-TNF $\alpha$  therapy. This suggests that the disease pathways affected are likely an indication of susceptibility to anti-TNF $\alpha$  treatment. As the afflicted pathways remains dysregulated prior and after therapy withdrawal in both relapse and remission patients, exogenous therapy by sequestration of TNF $\alpha$  may accomplish little to reestablish healthy physiological TCR response. Despite this, we detected selective divergence in certain genes (e.g. *TRAF1*) with these pathways that may aid in termination or resolution of TCR induced signaling for remission individuals. Notably, disease association within the *TRAF1-C5* locus[37-39], and epigenetic dysregulation within the *TRAF1* locus of CD4 T cells have been detected in JIA patients[40]. Studies using *TRAF1*<sup>-/-</sup> mice revealed TRAF1 negative regulatory role in T cells response to TCR and TNF $\alpha$  signaling[24]. *TRAF1*<sup>-/-</sup> T cells show enhanced proliferation in response to TCR and TNF $\alpha$  stimulation resulting in NF- $\kappa$ B and AP-1 activation[24].

In summary, by applying a combination of high dimensionality technologies, we have identified functional perturbations of the immunome in patients with arthritis who will relapse upon withdrawal for anti-TNF $\alpha$  therapy. These aberrations show that relapse of clinical disease relies on a foundation of complex and diverse interlacing immune mechanisms, which affect both the effector and regular arms of adaptive T cell immunity. Our findings have an immediate translational valency. Indeed, they are clinically relevant as a contribution to precision medicine [41] by offering a tool to affect clinical management. They are mechanistically relevant as, altogether, define a cluster of deranged mechanisms which can be target of focused intervention.



## Immunome perturbation in arthritic patients who relapse upon withdrawal

### REFERENCES

1. Lovell DJ, Giannini EH, Reiff A, et al. Etanercept in children with polyarticular juvenile rheumatoid arthritis. Pediatric Rheumatology Collaborative Study Group. *N Engl J Med.* 2000;342(11):763-9.
2. Taddio A, Cattalini M, Simonini G, et al. Recent advances in the use of Anti-TNF $\alpha$  therapy for the treatment of juvenile idiopathic arthritis. *Expert Rev Clin Immunol.* 2016;12(6):641-9.
3. Baszis K, Garbutt J, Toib D, et al. Clinical outcomes after withdrawal of anti-tumor necrosis factor alpha therapy in patients with juvenile idiopathic arthritis: a twelve-year experience. *Arthritis Rheum.* 2011;63(10):3163-8.
4. Iglesias E, Torrente-Segarra V, Bou R, et al. Non-systemic juvenile idiopathic arthritis outcome after reaching clinical remission with anti-TNF-alpha therapy: a clinical practice observational study of patients who discontinued treatment. *Rheumatol Int.* 2014;34(8):1053-7.
5. Leong JY, Guan YJ, Albani S, et al. Recent advances in our understanding of the pathogenesis of juvenile idiopathic arthritis and their potential clinical implications. *Expert Rev Clin Immunol.* 2018;14(11):933-44.
6. Eyre S, Orozco G, Worthington J. The genetics revolution in rheumatology: large scale genomic arrays and genetic mapping. *Nat Rev Rheumatol.* 2017;13(7):421-32.
7. Hunter PJ, Nistala K, Jina N, et al. Biologic predictors of extension of oligoarticular juvenile idiopathic arthritis as determined from synovial fluid cellular composition and gene expression. *Arthritis Rheum.* 2010;62(3):896-907.
8. Cosmi L, Cimaz R, Maggi L, et al. Evidence of the transient nature of the Th17 phenotype of CD4+CD161+ T cells in the synovial fluid of patients with juvenile idiopathic arthritis. *Arthritis Rheum.* 2011;63(8):2504-15.
9. Issekutz AC, Quinn PJ, Lang B, et al. Coexpression of chemokine receptors CCR5, CXCR3, and CCR4 and ligands for P- and E-selectin on T lymphocytes of patients with juvenile idiopathic arthritis. *Arthritis Rheum.* 2011;63(11):3467-76.
10. Prakken B, Albani S, Martini A. Juvenile idiopathic arthritis. *Lancet.* 2011;377(9783):2138-49.
11. Spreafico R, Rossetti M, van Loosdregt J, et al. A circulating reservoir of pathogenic-like CD4+ T cells shares a genetic and phenotypic signature with the inflamed synovial microenvironment. *Ann Rheum Dis.* 2016;75(2):459-65.
12. Rossetti M, Spreafico R, Consolaro A, et al. TCR repertoire sequencing identifies synovial Treg cell clonotypes in the bloodstream during active inflammation in human arthritis. *Ann Rheum Dis.* 2017;76(2):435-41.
13. Jiang K, Zhu L, Buck MJ, et al. Disease-Associated Single-Nucleotide Polymorphisms From Noncoding Regions in Juvenile Idiopathic Arthritis Are Located Within or Adjacent to Functional Genomic Elements of Human Neutrophils and CD4+ T Cells. *Arthritis Rheumatol.* 2015;67(7):1966-77.
14. Spreafico R, Rossetti M, Whitaker JW, et al. Epipolymorphisms associated with the clinical outcome of autoimmune arthritis affect CD4+ T cell activation pathways. *Proc Natl Acad Sci U S A.* 2016;113(48):13845-50.
15. Determining Predictors of Safe Discontinuation of Anti-TNF Treatment in JIA. <https://clinicaltrials.gov/show/NCT00792233>.
16. Wallace CA, Ruperto N, Giannini E, et al. Preliminary criteria for clinical remission for select categories of juvenile idiopathic arthritis. *J Rheumatol.* 2004;31(11):2290-4.
17. Lai L, Ong R, Li J, et al. A CD45-based barcoding approach to multiplex mass-cytometry (CyTOF). *Cytometry A.* 2015;87(4):369-74.

## Immunome perturbation in arthritic patients who relapse upon withdrawal

18. Collison J. Paediatric rheumatology: Novel Treg cell subset discovered in JIA. *Nat Rev Rheumatol.* 2016;12(8):436-7.
19. Haufe S, Haug M, Schepp C, et al. Impaired suppression of synovial fluid CD4+CD25-T cells from patients with juvenile idiopathic arthritis by CD4+CD25+ Treg cells. *Arthritis Rheum.* 2011;63(10):3153-62.
20. Henderson LA, Volpi S, Frugoni F, et al. Next-Generation Sequencing Reveals Restriction and Clonotypic Expansion of Treg Cells in Juvenile Idiopathic Arthritis. *Arthritis Rheumatol.* 2016;68(7):1758-68.
21. Hinks A, Cobb J, Marion MC, et al. Dense genotyping of immune-related disease regions identifies 14 new susceptibility loci for juvenile idiopathic arthritis. *Nat Genet.* 2013;45(6):664-9.
22. Hersh AO, Prahalad S. Immunogenetics of juvenile idiopathic arthritis: A comprehensive review. *J Autoimmun.* 2015;64:113-24.
23. Ebata T, Mogi S, Hata Y, et al. Rapid induction of CD95 ligand and CD4+ T cell-mediated apoptosis by CD137 (4-1BB) costimulation. *Eur J Immunol.* 2001;31(5):1410-6.
24. Tsitsikov EN, Laouini D, Dunn IF, et al. TRAF1 is a negative regulator of TNF signaling. enhanced TNF signaling in TRAF1-deficient mice. *Immunity.* 2001;15(4):647-57.
25. Filby A, Seddon B, Kleczkowska J, et al. Fyn regulates the duration of TCR engagement needed for commitment to effector function. *J Immunol.* 2007;179(7):4635-44.
26. Salmond RJ, Filby A, Qureshi I, et al. T-cell receptor proximal signaling via the Src-family kinases, Lck and Fyn, influences T-cell activation, differentiation, and tolerance. *Immunol Rev.* 2009;228(1):9-22.
27. Harr MW, McColl KS, Zhong F, et al. Glucocorticoids downregulate Fyn and inhibit IP(3)-mediated calcium signaling to promote autophagy in T lymphocytes. *Autophagy.* 2010;6(7):912-21.
28. Nagila A, Netsawang J, Suttitheptumrong A, et al. Inhibition of p38MAPK and CD137 signaling reduce dengue virus-induced TNF-alpha secretion and apoptosis. *Viol J.* 2013;10:105.
29. Doitsh G, Galloway NL, Geng X, et al. Cell death by pyroptosis drives CD4 T-cell depletion in HIV-1 infection. *Nature.* 2014;505(7484):509-14.
30. Nishimoto T, Seta N, Anan R, et al. A single nucleotide polymorphism of TRAF1 predicts the clinical response to anti-TNF treatment in Japanese patients with rheumatoid arthritis. *Clin Exp Rheumatol.* 2014;32(2):211-7.
31. Lee DJ, Du F, Chen SW, et al. Regulation and Function of the Caspase-1 in an Inflammatory Microenvironment. *J Invest Dermatol.* 2015;135(8):2012-20.
32. Zhang J, Feng H, Zhao J, et al. IkappaB Kinase epsilon Is an NFATc1 Kinase that Inhibits T Cell Immune Response. *Cell Rep.* 2016;16(2):405-18.
33. Calabrese L, Mariette X. The evolving role of the rheumatologist in the management of immune-related adverse events (irAEs) caused by cancer immunotherapy. *Ann Rheum Dis.* 2018;77(2):162-4.
34. Kim ST, Tayar J, Trinh VA, et al. Successful treatment of arthritis induced by checkpoint inhibitors with tocilizumab: a case series. *Ann Rheum Dis.* 2017;76(12):2061-4.
35. Mellado M, Martinez-Munoz L, Cascio G, et al. T Cell Migration in Rheumatoid Arthritis. *Front Immunol.* 2015;6:384.
36. Wehrens EJ, Vastert SJ, Mijnheer G, et al. Anti-tumor necrosis factor alpha targets protein kinase B/c-Akt-induced resistance of effector cells to suppression in juvenile idiopathic arthritis. *Arthritis Rheum.* 2013;65(12):3279-84.
37. Albers HM, Kurreeman FA, Houwing-Duistermaat JJ, et al. The TRAF1/C5 region is a risk factor for polyarthritis in juvenile idiopathic arthritis. *Ann Rheum Dis.* 2008;67(11):1578-80.

## Immunome perturbation in arthritic patients who relapse upon withdrawal

38. Behrens EM, Finkel TH, Bradfield JP, et al. Association of the TRAF1-C5 locus on chromosome 9 with juvenile idiopathic arthritis. *Arthritis Rheum.* 2008;58(7):2206-7.
39. Pers YM, Le Blay P, Ludwig C, et al. Association of TRAF1-C5 with risk of uveitis in juvenile idiopathic arthritis. *Joint Bone Spine.* 2017;84(3):305-8.
40. Zhu L, Jiang K, Webber K, et al. Chromatin landscapes and genetic risk for juvenile idiopathic arthritis. *Arthritis Res Ther.* 2017;19(1):57.
41. Leong JY, Albani S. Using a theragnostic approach in juvenile idiopathic arthritis. *Expert Opinion on Orphan Drugs.* 2016;4(3):269-80.

### **Contributors**

JY Leong performed the CyToF, sorting and Nanostring experiments and analysis. P Chen and SL Poh helped with the CyToF and Nanostring runs. F Ally, C Chua, SN Hazirah helped with mRNA processing and Nanostring. L Pan helped write the R scripts for the CyToF analysis. L Lai helped with the CyToF. LT Bathi helped with sample processing. D Lovell, JG Yeo, ESC Lee, T Arkachaisri and PRSCG, helped with patient recruitment. S Albani was the lead principal investigator.

### **Funding**

Grant support from NMRC (NMRC/STaR/020/2013, NMRC/MOHIAFCAT2/2/08, MOHIAFCAT2/0001/2014, NMRC MOHIAFCAT1-6003, Centre Grants, TCR15Jun006, NMRC/CIRG/1460/2016, MH 095:003\016-0002), Duke-NUS, A\*STAR-BMRC (IAF311020), BMRC (SPF2014/005) is gratefully acknowledged.

### **Competing interests**

The authors declare no conflicts of interest.

### **Ethics approval**

## Immunome perturbation in arthritic patients who relapse upon withdrawal

All samples were collected upon informed consent. All experiments were conducted according to the principles expressed in the Declaration of Helsinki, and IRB approved by the Sanford-Burnham or KK Women's and Children's Hospital IRB Committee.

### FIGURE LEGENDS

**Figure 1. Perturbation in CD4 landscape in JIA patients who will relapse.** Circulatory CD3<sup>+</sup>CD4<sup>+</sup> cells from JIA patients (n=20; relapse =9, remission =11) prior to therapy withdrawal were stained with 31 functional markers in CyToF and dimensionally reduced onto a bivariate X-Y axis scale with t-SNE. **(A)** The t-SNE map is segregated into 28 distinct nodes with k-means, and node 22 is highlighted (red-dotted box). **(B)** The distribution of relative cell frequency in relapse or remission patients across the nodes is shown, with node 22 significantly higher ( $p < 0.01$ ) in relapse individuals. **(C)** The phenotypic expression of markers is shown for node 22 (red-dotted box). **(D)** Supervised gating of the pre-clustering FCS files validates the relevant CD4 memory cellular subsets in relapse versus remission individuals. **(E)** Correlation analysis of CD45RA<sup>-</sup>TNF $\alpha$ <sup>+</sup> versus CD45RA<sup>-</sup>CD152<sup>-</sup>/PD1<sup>-</sup> or CD45RA<sup>-</sup>CD152<sup>+</sup>/PD1<sup>+</sup> as percentage of CD3<sup>+</sup>CD4<sup>+</sup> cells across JIA patients. **(F)** Percentage of TNF $\alpha$ <sup>+</sup> cells in CD45RA<sup>-</sup>CD152<sup>-</sup>/PD1<sup>-</sup> or CD45RA<sup>-</sup>CD152<sup>+</sup>/PD1<sup>+</sup> compartment. Correlation analysis of CD45RA<sup>-</sup>TNF $\alpha$ <sup>+</sup> versus **(G)** CD45RA<sup>-</sup>CD152<sup>-</sup>/PD1<sup>-</sup> or **(H)** CD45RA<sup>-</sup>CD152<sup>+</sup>/PD1<sup>+</sup> as percentage of CD3<sup>+</sup>CD4<sup>+</sup> cells across relapse or remission patients. Comparison of cellular subsets performed with Mann-Whitney U, unpaired or paired two tail test, means  $\pm$  S.D., \*  $p < 0.05$ , \*\*  $p < 0.01$ . Correlation analysis performed with Pearson correlation, two tail test.

## Immunome perturbation in arthritic patients who relapse upon withdrawal

**Figure 2. Subclinical T-effector diversification in relapse individuals.** CD4<sup>+</sup>TNFα<sup>+</sup> cells from JIA patients (n=20; relapse =9, remission =11) prior to therapy withdrawal and healthy paediatric controls (n=10) were analysed through t-SNE. (A) The CD4<sup>+</sup>TNFα<sup>+</sup> t-SNE map is segregated into 21 nodes with enrichment in (B) node 17 (p < 0.05) for relapse as compared with remission individuals and (C-D) node 17,18 and 13 (p <0.05) for relapse as compared with healthy individuals. (E) The phenotype expression is shown for node 17,18 and 13 (red-dotted boxes). (F) Supervised gating of pre-clustering FCS files validates the relevant CD4 memory cellular subsets in relapse versus healthy individuals. (G) Supervised gating of CD4<sup>+</sup>CD45RA<sup>-</sup>TNFα<sup>+</sup>IL-6<sup>+</sup> cells in relapse/remission/healthy individuals. (H) Relative TNFα intensity in CD45RA<sup>-</sup>IL-6<sup>+</sup> or CD45RA<sup>-</sup>IL-6<sup>-</sup> cells. (I) The fold difference in TNFα intensity in CD45RA<sup>-</sup>IL-6<sup>+</sup> over CD45RA<sup>-</sup>IL-6<sup>-</sup> cells in relapse/remission/healthy individuals. Comparison of cellular subsets performed with Mann-Whitney U, unpaired or paired two tail test, means ± S.D., \* p < 0.05, \*\* p < 0.01.

**Figure 3. Emergence of T-effector diversification in flare manifestation and quiescence in stable remission.** (A-D) CD4<sup>+</sup> T cells from JIA patients (n=16; relapse=9, remission=7) withdrawn from therapy for 8 months were analysed with t-SNE. (A) The t-SNE map is segregated into 24 nodes, node 7 is highlighted (blue dotted box). (B) The distribution of relative cell frequency across the nodes is shown, with node 7 enriched (p < 0.05) in relapse individuals, exhibiting (C) CD4<sup>+</sup>CD45RA<sup>-</sup>TNFα<sup>+</sup>IL-6<sup>+</sup>IFNγ<sup>-</sup> phenotype (red-dotted box). (D) Supervised gating of pre-clustering FCS files for CD4<sup>+</sup>CD45RA<sup>-</sup>TNFα<sup>+</sup>IL-6<sup>+</sup> in relapse and remission patients. (E) Supervised gating of relevant CD4<sup>+</sup>CD45RA<sup>-</sup>TNFα<sup>+</sup> subsets in remission patients (T<sub>0</sub>: prior to withdrawal or T<sub>end</sub>: 8 months after withdrawal) or healthy individuals. (F-G) CD4<sup>+</sup> T cells from JIA remission patients (n=18; T<sub>0</sub>=11, T<sub>end</sub>=7) and healthy controls (n=10) were analysed with t-SNE. (F) The distribution of relative cell

## Immunome perturbation in arthritic patients who relapse upon withdrawal

frequency across the nodes is shown, with node 17 enriched ( $p < 0.05$ ) in remission  $T_0$  and node 1 enriched ( $p < 0.05$ ) in remission  $T_{end}$  as compared with healthy individuals. (G) Node 1 and 17 phenotypes are depicted. Comparison of cellular subsets performed with Mann-Whitney U, two tail test, means  $\pm$  S.D., \*  $p < 0.05$ , \*\*  $p < 0.01$ .

**Figure 4. Corresponding increase of memory Tregs and CD45RA<sup>-</sup>TNFA<sup>+</sup> prior to relapse.** Supervised gating of Tregs and CD45RA<sup>-</sup>Tregs in JIA patients (A) prior (n=20) and (B) after withdrawal (n=16) of therapy. (C-D) Tregs cells from JIA patients (n=20; relapse=9, remission=11) prior to withdrawal is analysed with t-SNE and (C) segregated into 4 nodes, with node 3 ( $p < 0.05$ ) enriched in relapse individuals. (D) Phenotype of node 3 is depicted. (E) Correlation analysis of frequency of Tregs or CD45RA<sup>-</sup>Tregs with CD45RA<sup>-</sup>TNFA<sup>+</sup>. Comparison of cellular subsets performed with Mann-Whitney U, two tail test, means  $\pm$  S.D., \*  $p < 0.05$ , \*\*\*\*  $p < 0.0001$ . Correlation analysis performed with Pearson correlation, two tail test.

**Figure 5. Transcriptomic divergence in disease centric pathways that persist despite therapy.** Genes enriched ( $p < 0.05$ , fold difference  $> 1.5$ ) in patients with JIA (relapse or remission) that were persistent from prior to after therapy withdrawal as compared with healthy individuals, were exported to DAVID for functional gene-set enrichment and gene associations were constructed with Cytoscape using the Reactome database. Five major pathways were dysregulated in relapse and remission patients with JIA compared to healthy controls: (A) TCR activation, (B) TNFA signaling, (C) NF-kB signaling, (D) apoptosis, (E) MAPK signaling (yellow=relapse/remission, blue= remission only). Genes enriched in remission individuals include <sup>1</sup>*Fyn*, <sup>2</sup>*TRAF1*, <sup>3</sup>*TNFRSF9*, <sup>4</sup>*CASP1* and <sup>5</sup>*IKBKE*.

## Immunome perturbation in arthritic patients who relapse upon withdrawal

**Figure 6. CD4<sup>+</sup>CD45RA<sup>-</sup>TNFα<sup>+</sup> discriminates clinical fate.** Duration and ROC of (A-B) disease (months) or (C-D) remission (months) prior to study enrolment is compared among relapse (n=18) or remission (n=21) individuals. (E) The ratio of memory CD4<sup>+</sup>CD45RA<sup>-</sup>TNFα<sup>+</sup> over naïve CD4<sup>+</sup>CD45RA<sup>+</sup>TNFα<sup>+</sup> of relapse or remission prior to withdrawal and healthy individuals is compared. Comparison of cellular subsets performed with Mann-Whitney U, two tail test, means ± S.D., \* p < 0.05. (F) ROC of ratio of CD4<sup>+</sup>CD45RA<sup>-</sup>TNFα<sup>+</sup> over CD4<sup>+</sup>CD45RA<sup>+</sup>TNFα<sup>+</sup> of relapse or remission prior to withdrawal. (G) CD3<sup>+</sup>CD4<sup>+</sup>CD45RA<sup>-</sup>CD45RO<sup>+</sup> T cells were compared in healthy paediatric controls (n=56) across the relevant age groups 7-8yrs (n=17), 9-10yrs (n=15), 11-12yrs (n=16) and 12-14yrs (n=8) or (H) against relapse (n=9) prior to therapy withdrawal for CD3<sup>+</sup>CD4<sup>+</sup>CD45RA<sup>-</sup>TNFα<sup>+</sup>. Comparison of cellular subsets performed with Kruskal-Wallis test, means ± S.D.

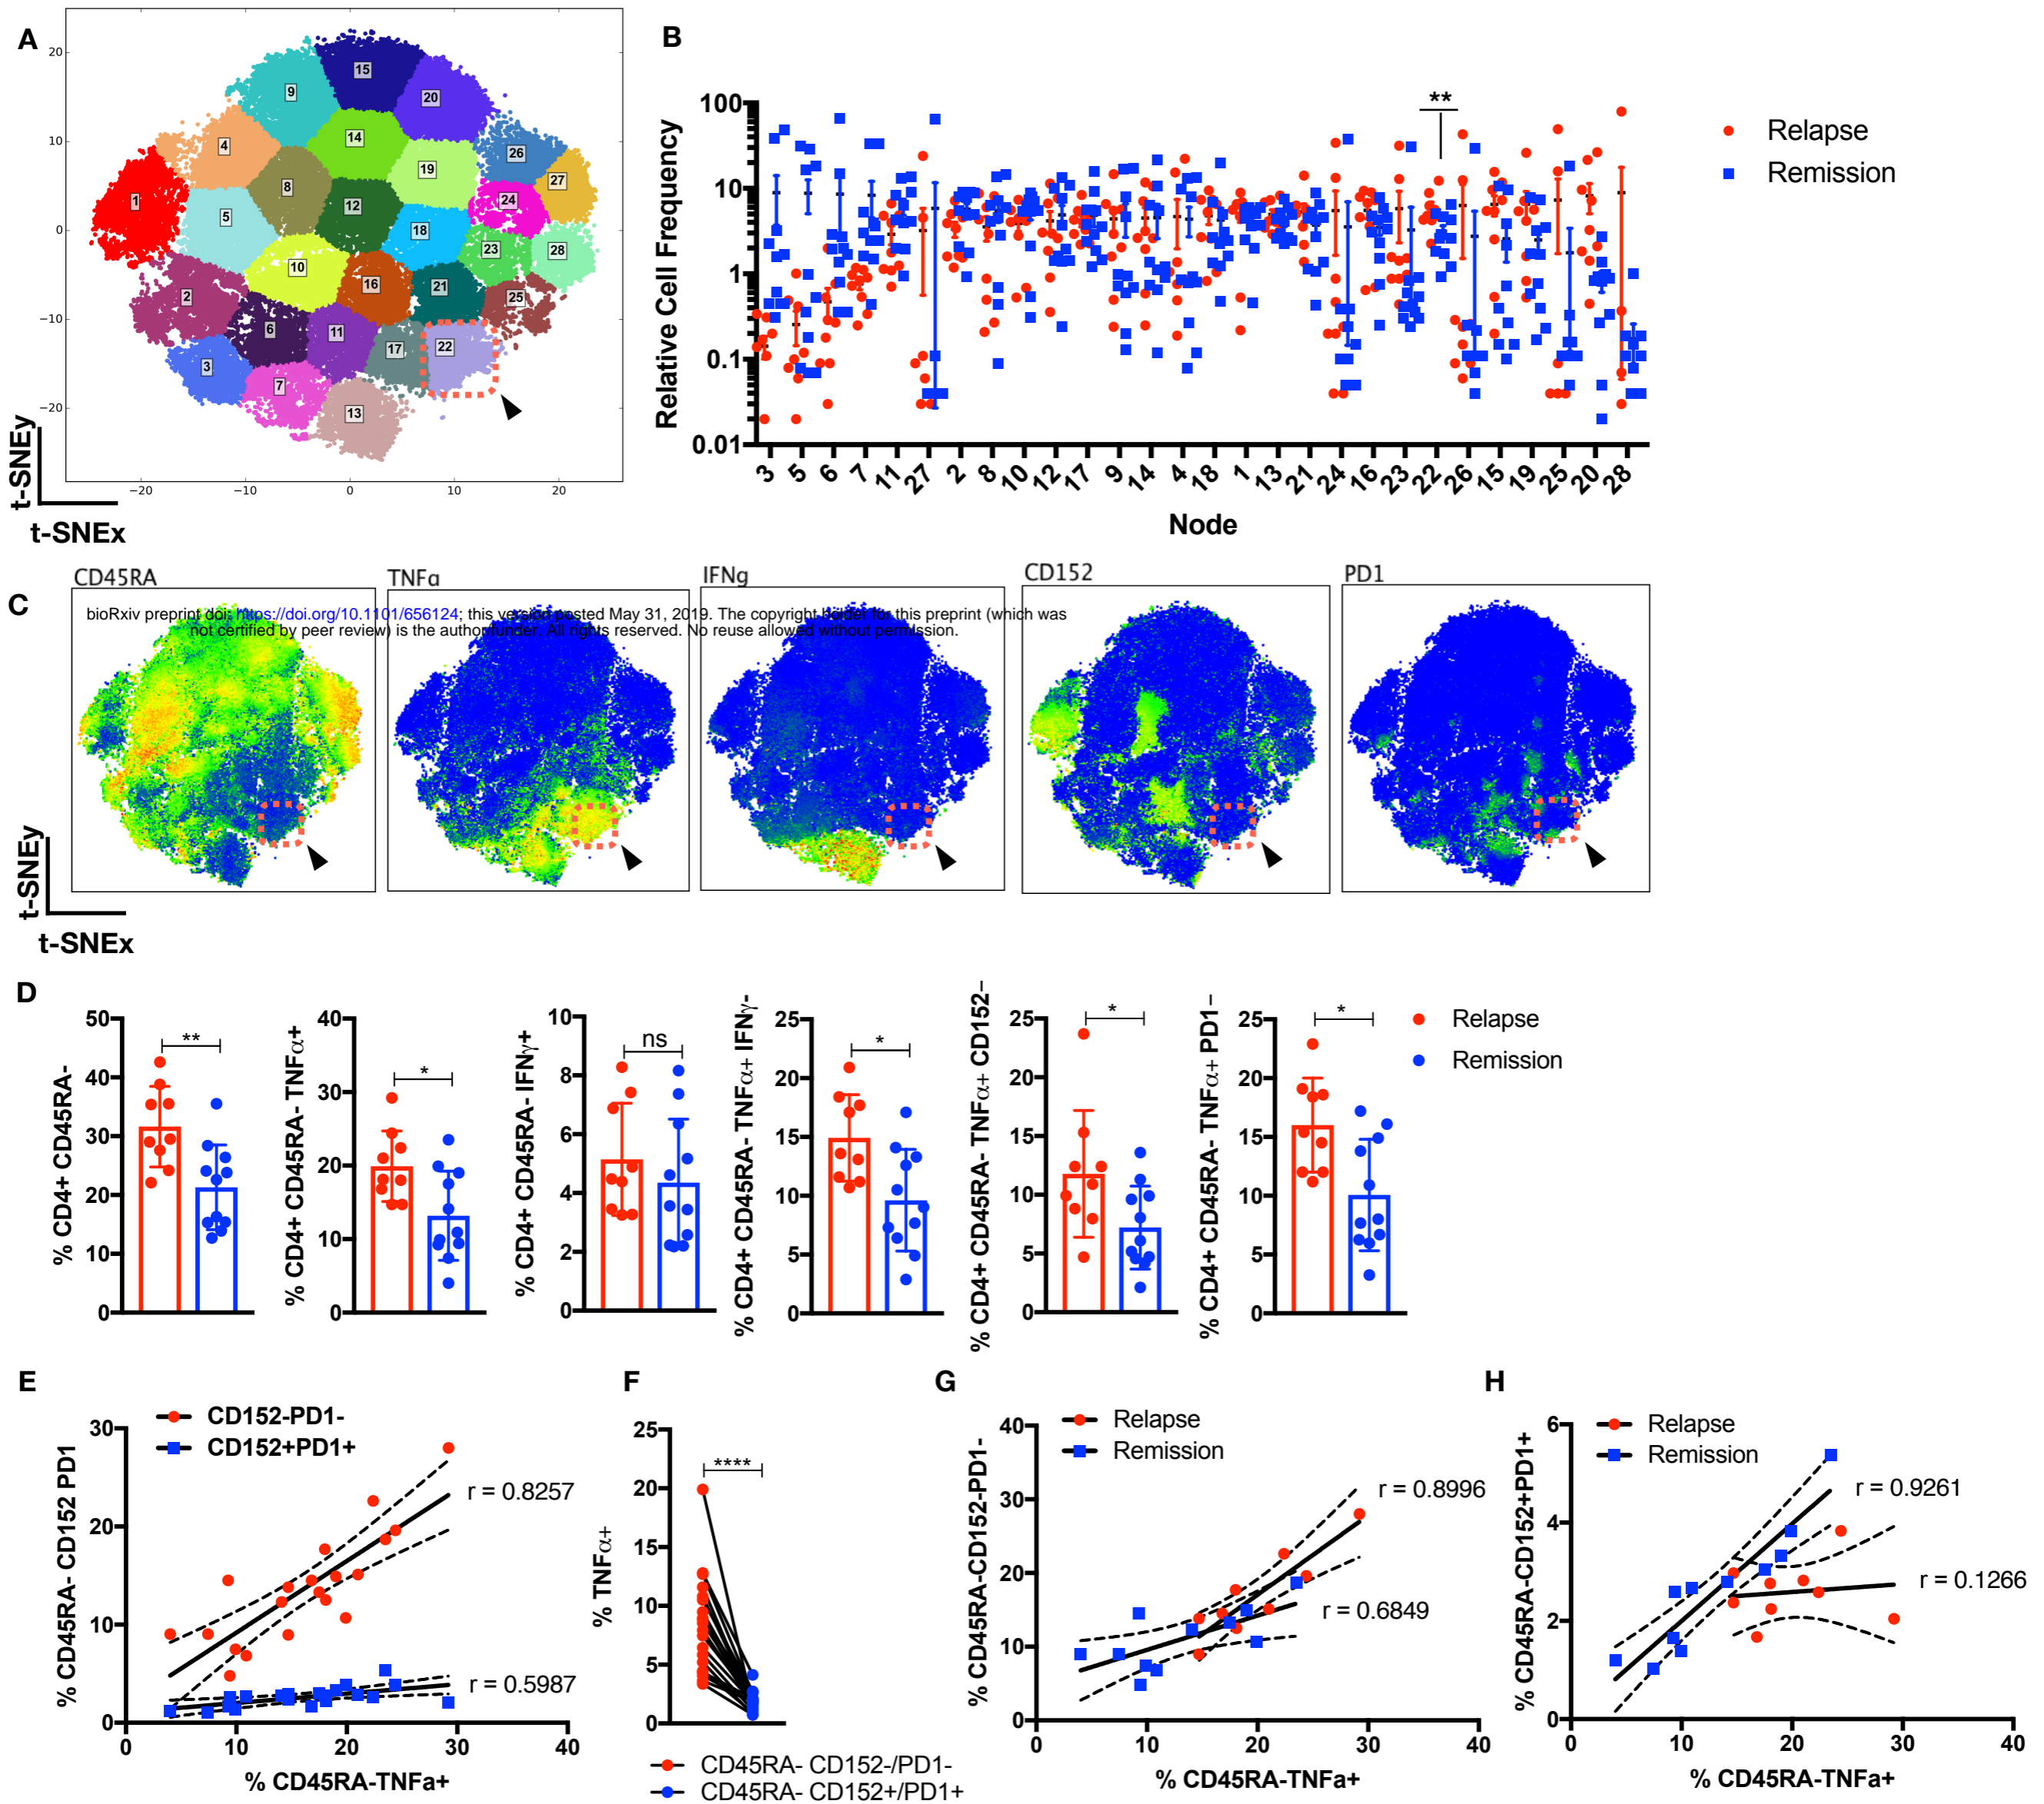



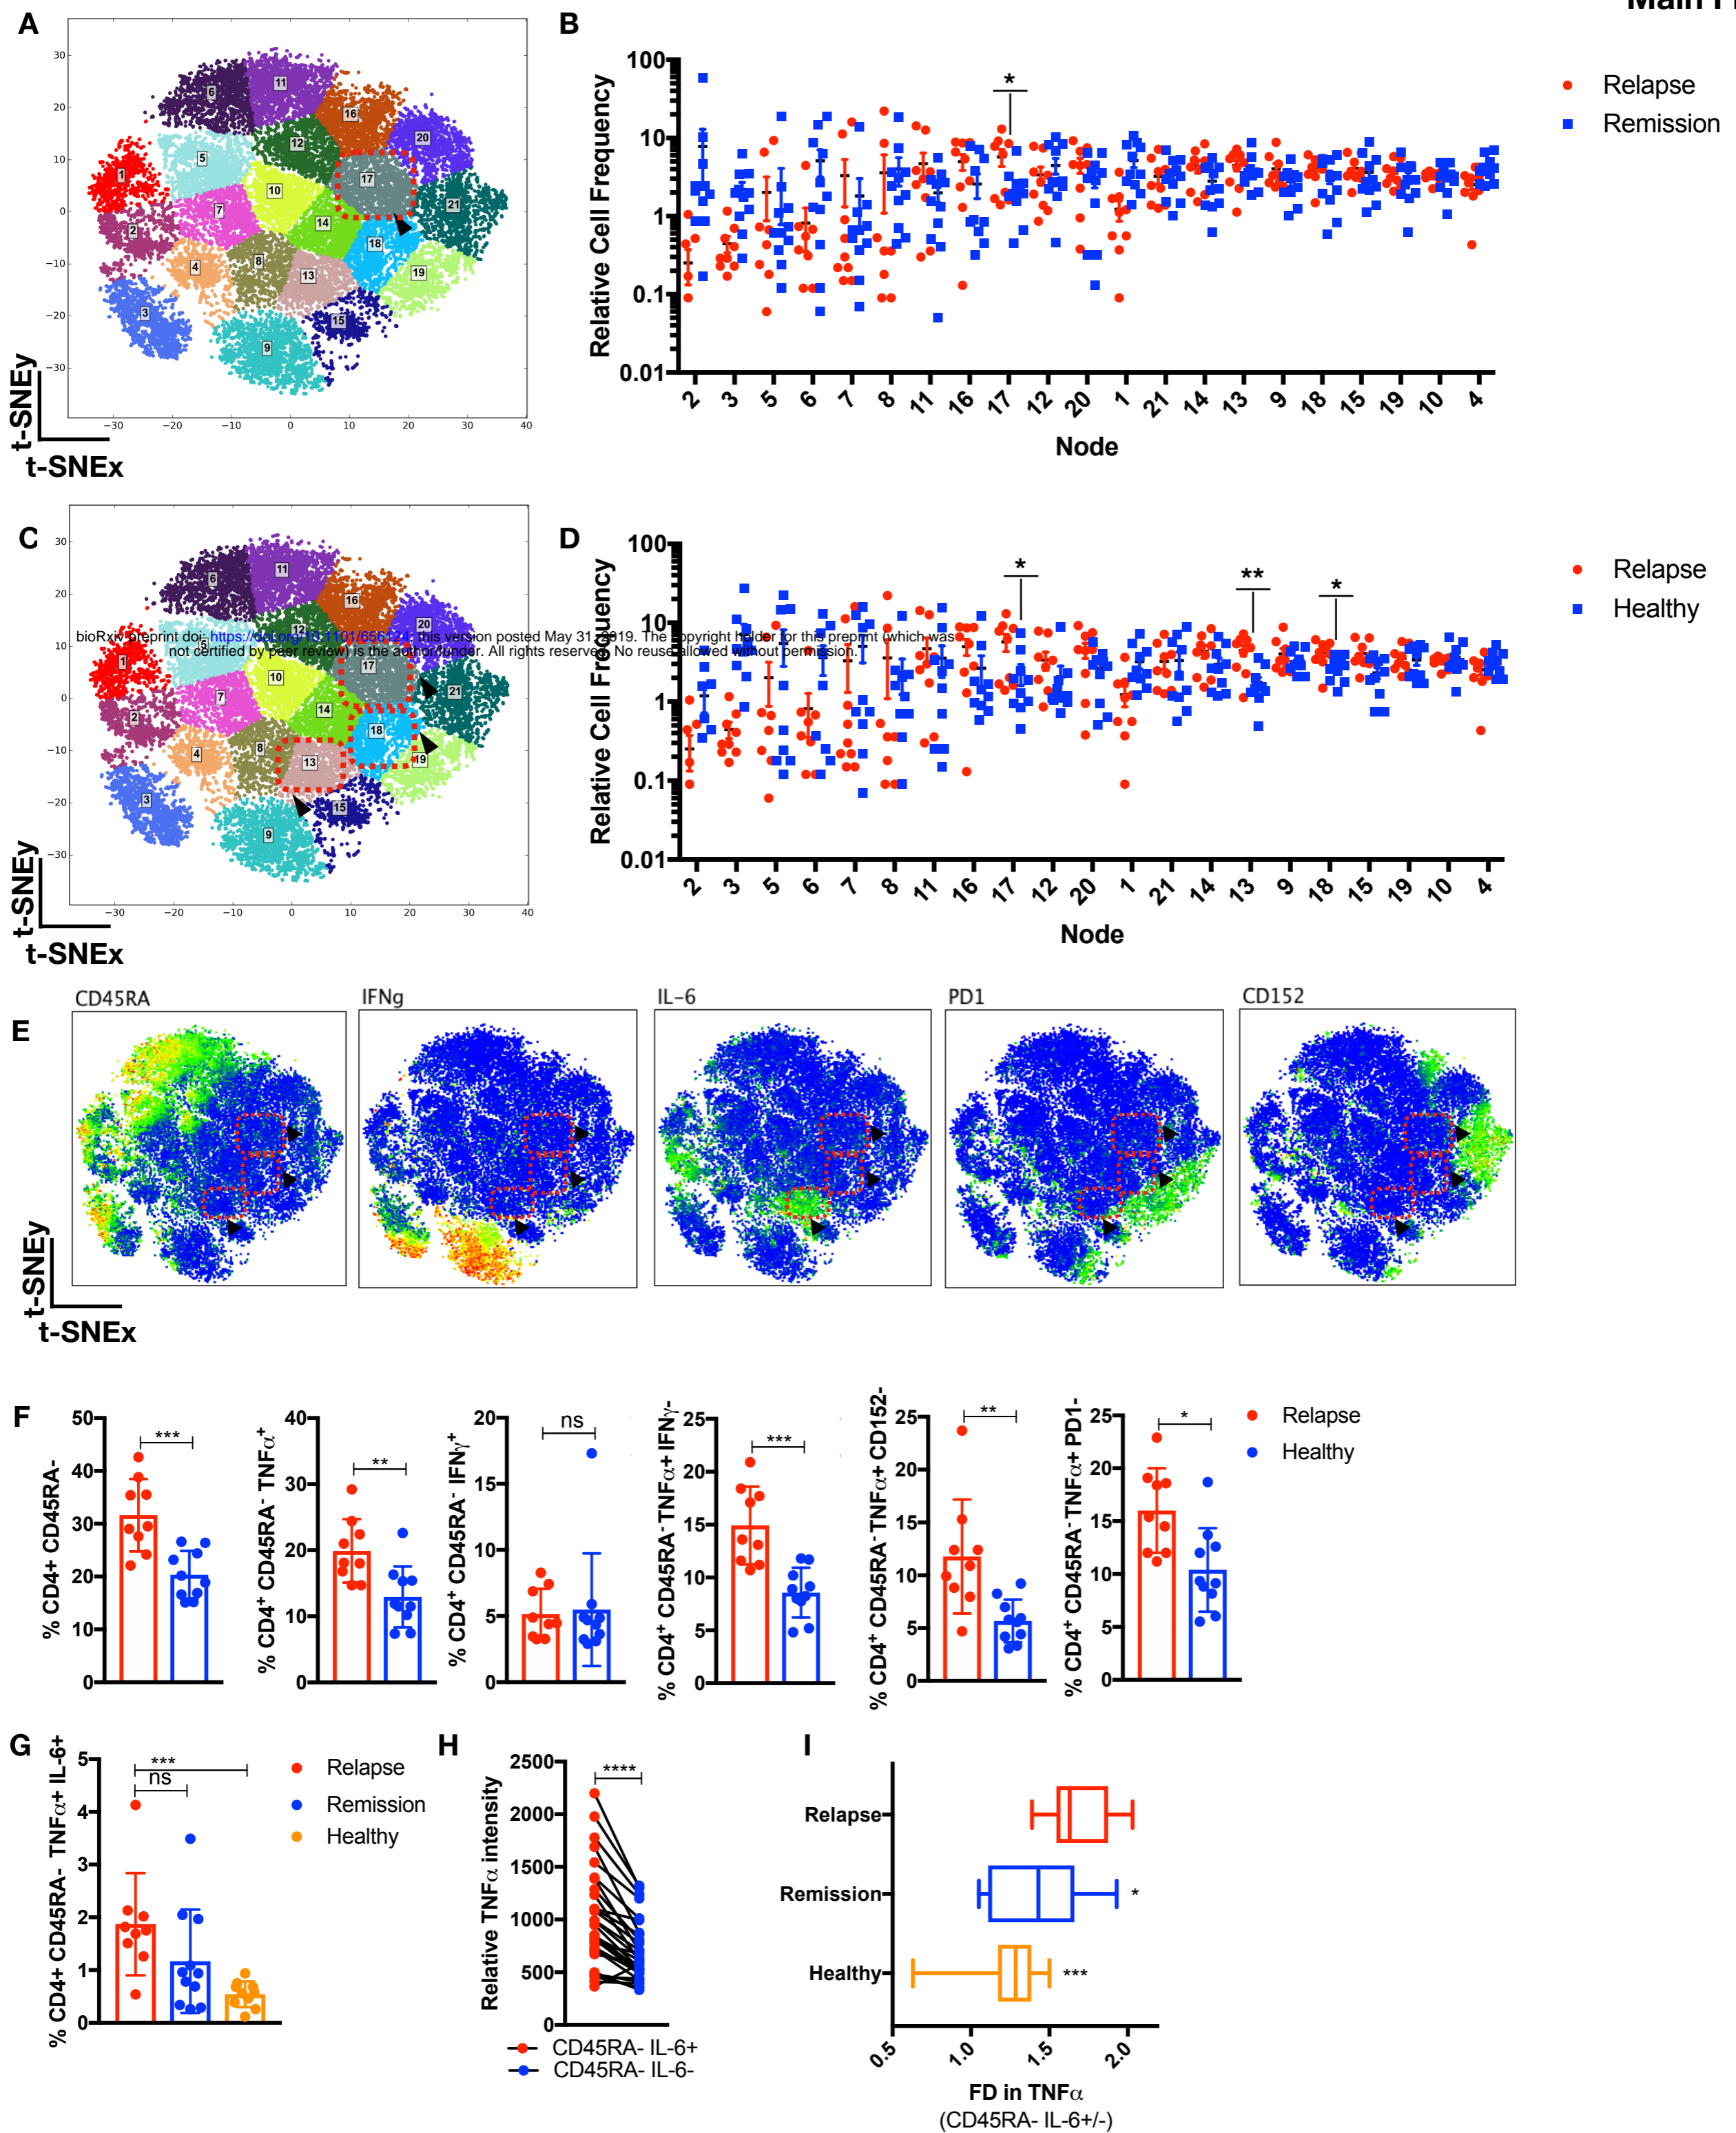

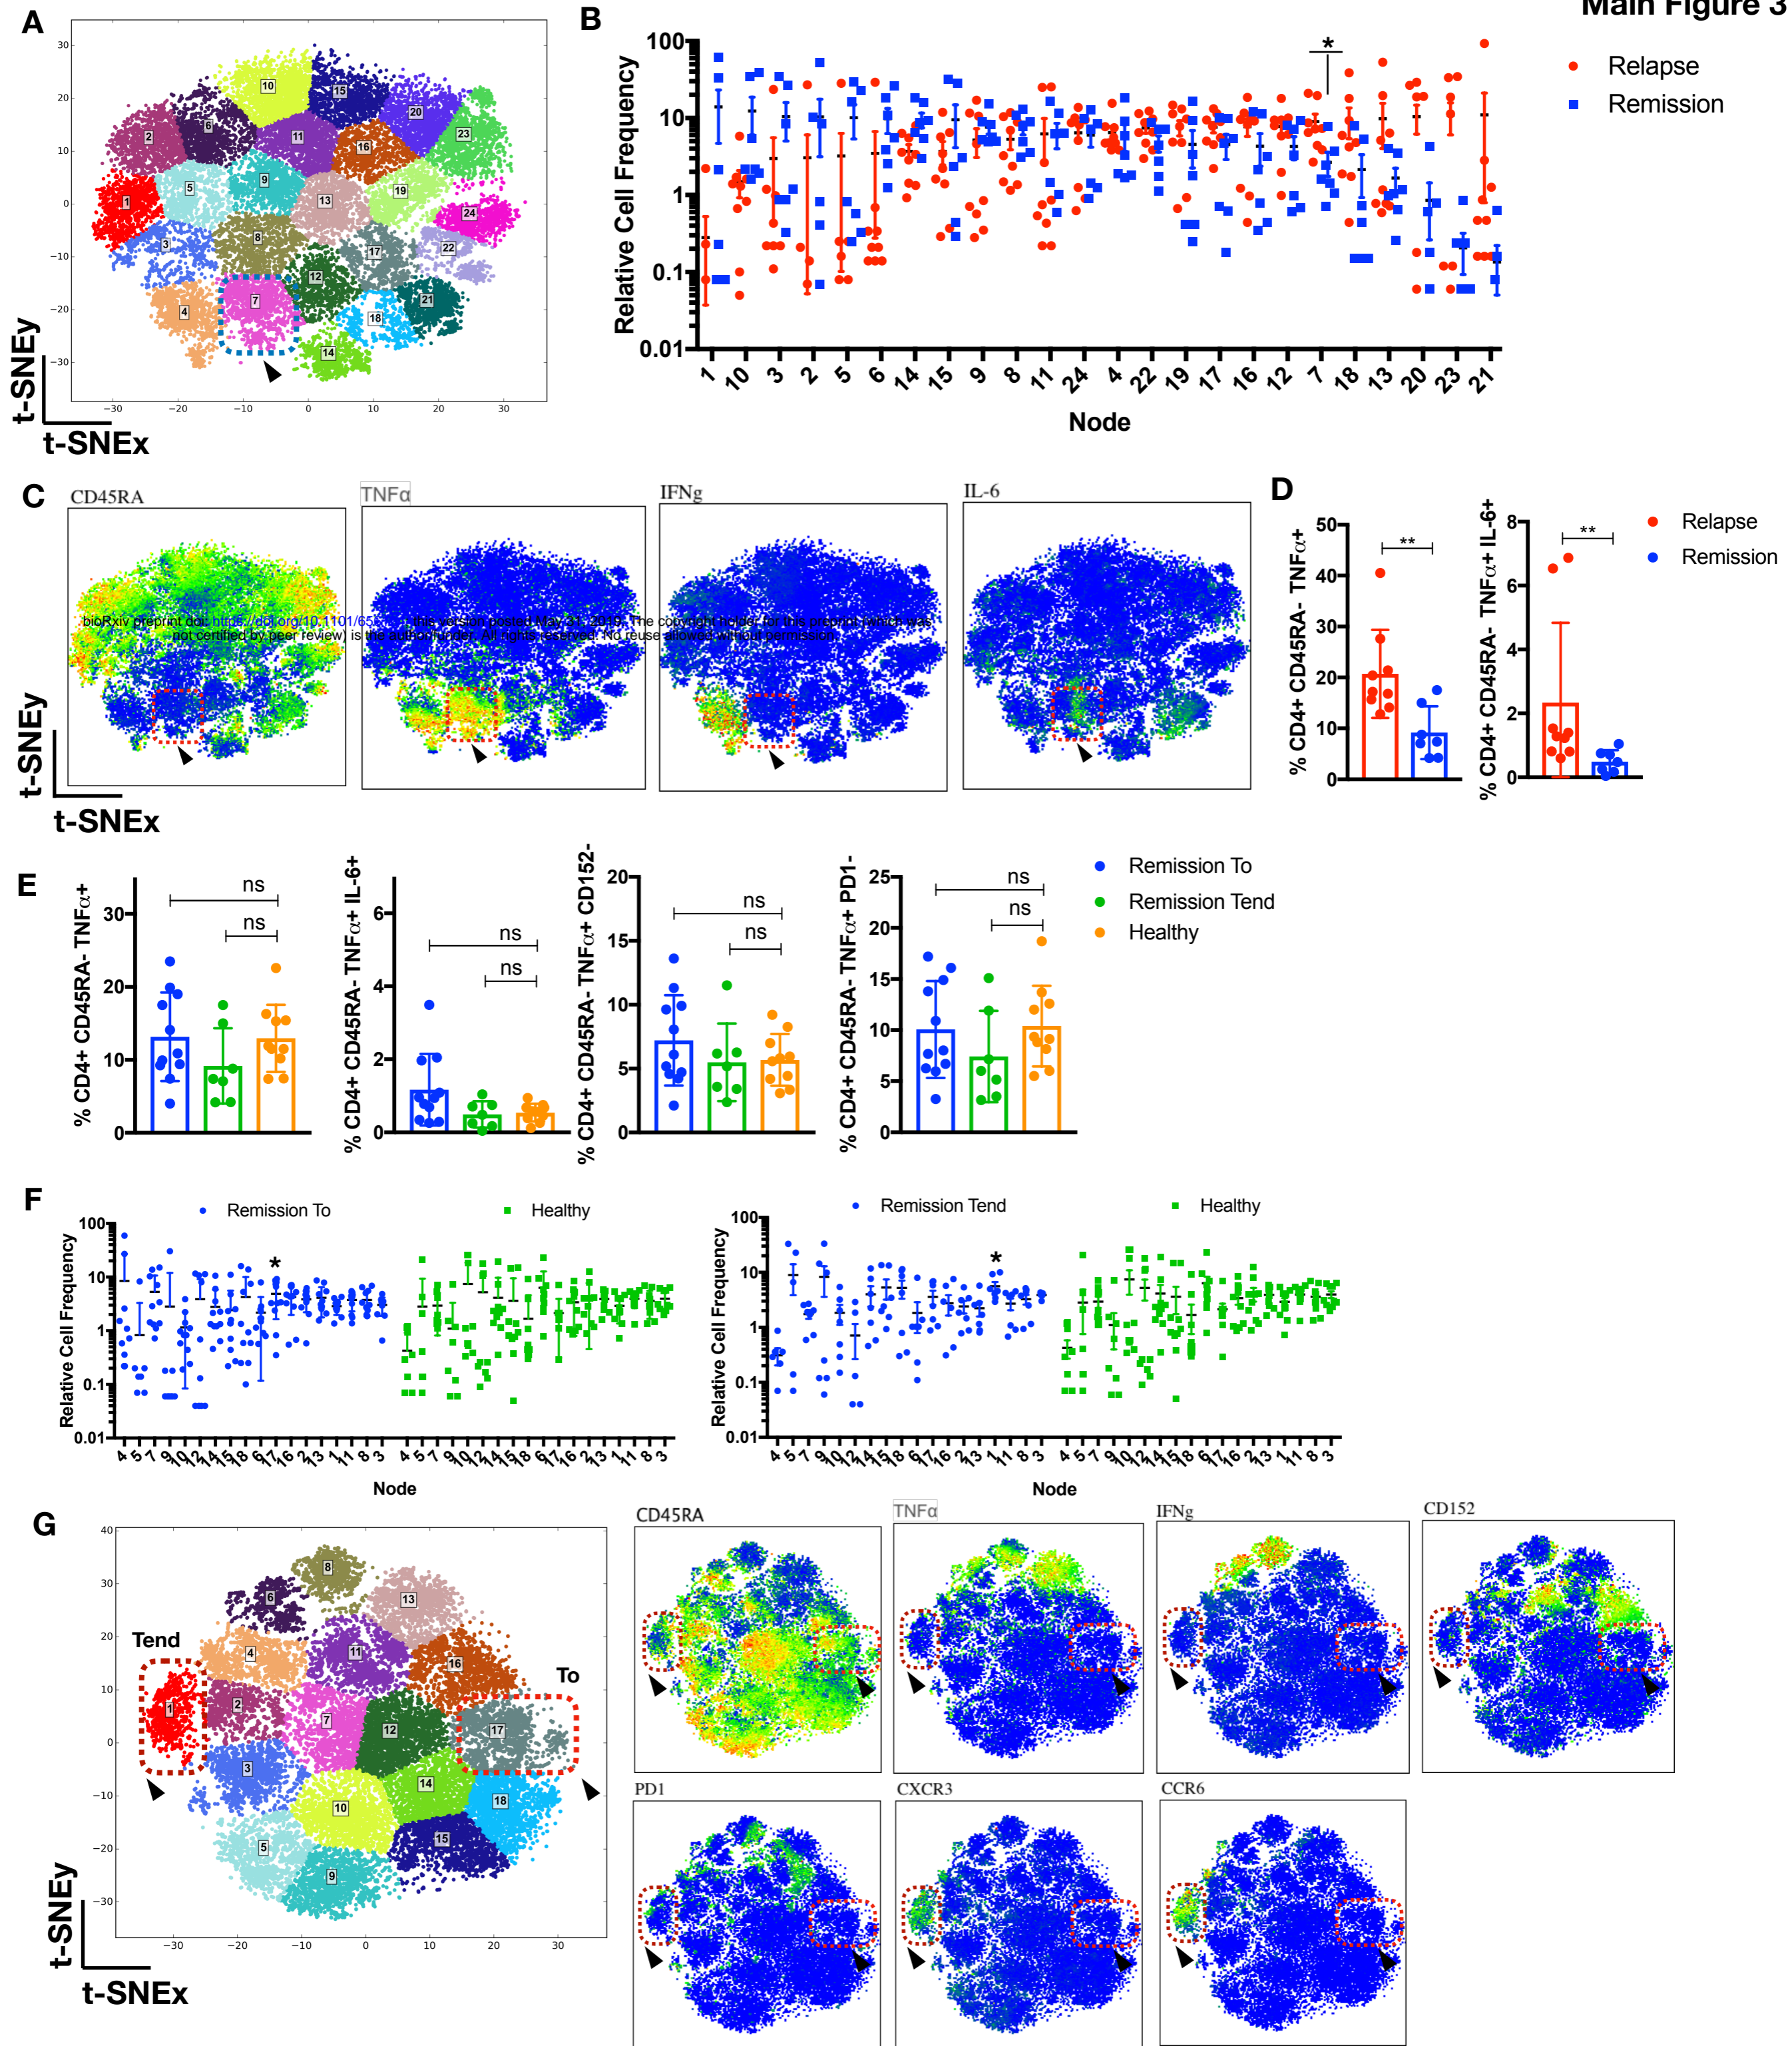

bioRxiv preprint doi: <https://doi.org/10.1101/165111>; this version posted May 31, 2019. The copyright holder for this preprint (which was not certified by peer review) is the author/funder. All rights reserved. No reuse allowed without permission.

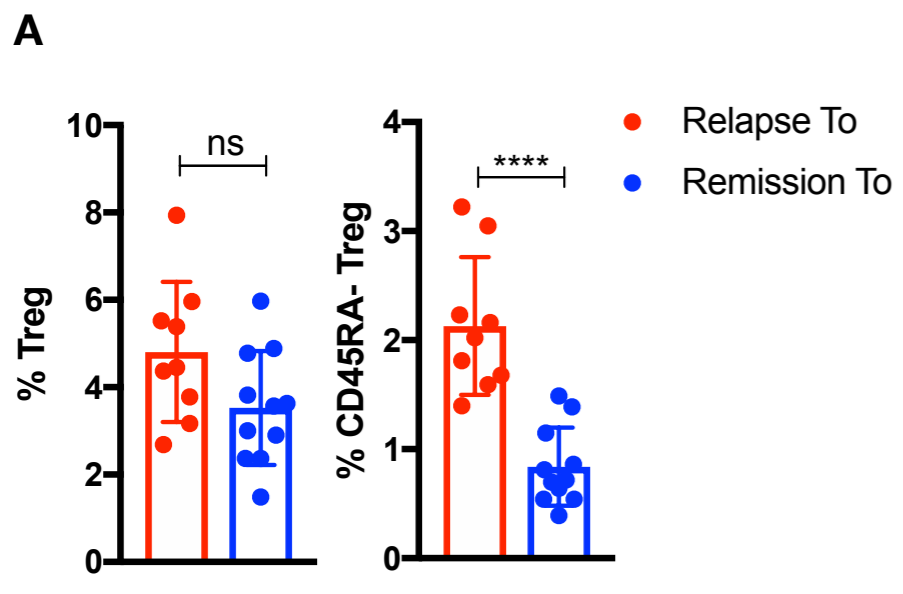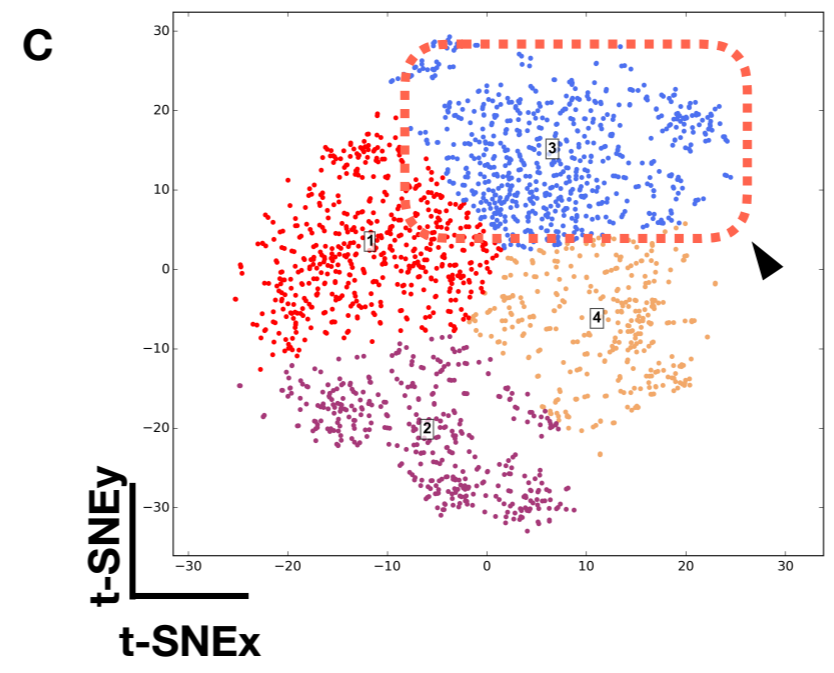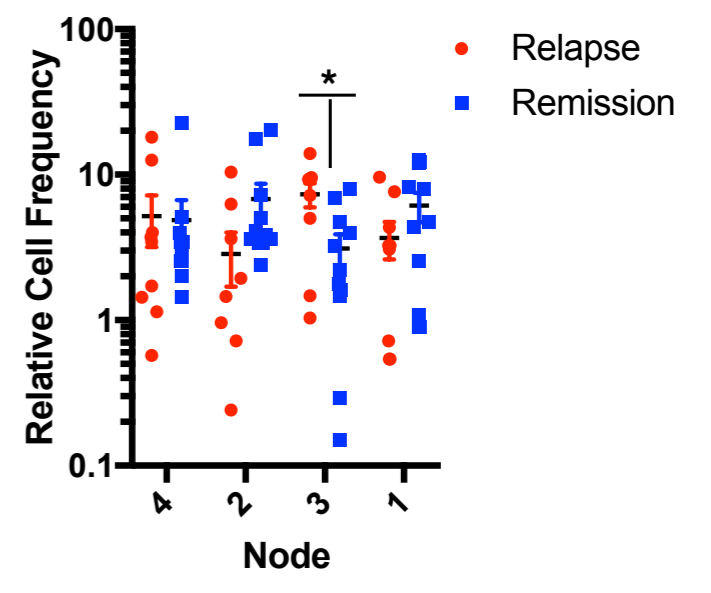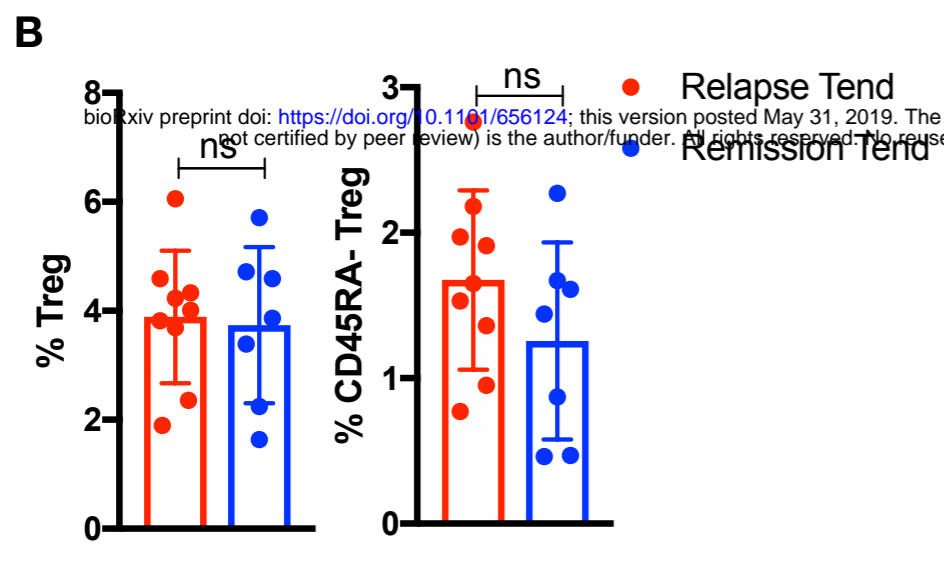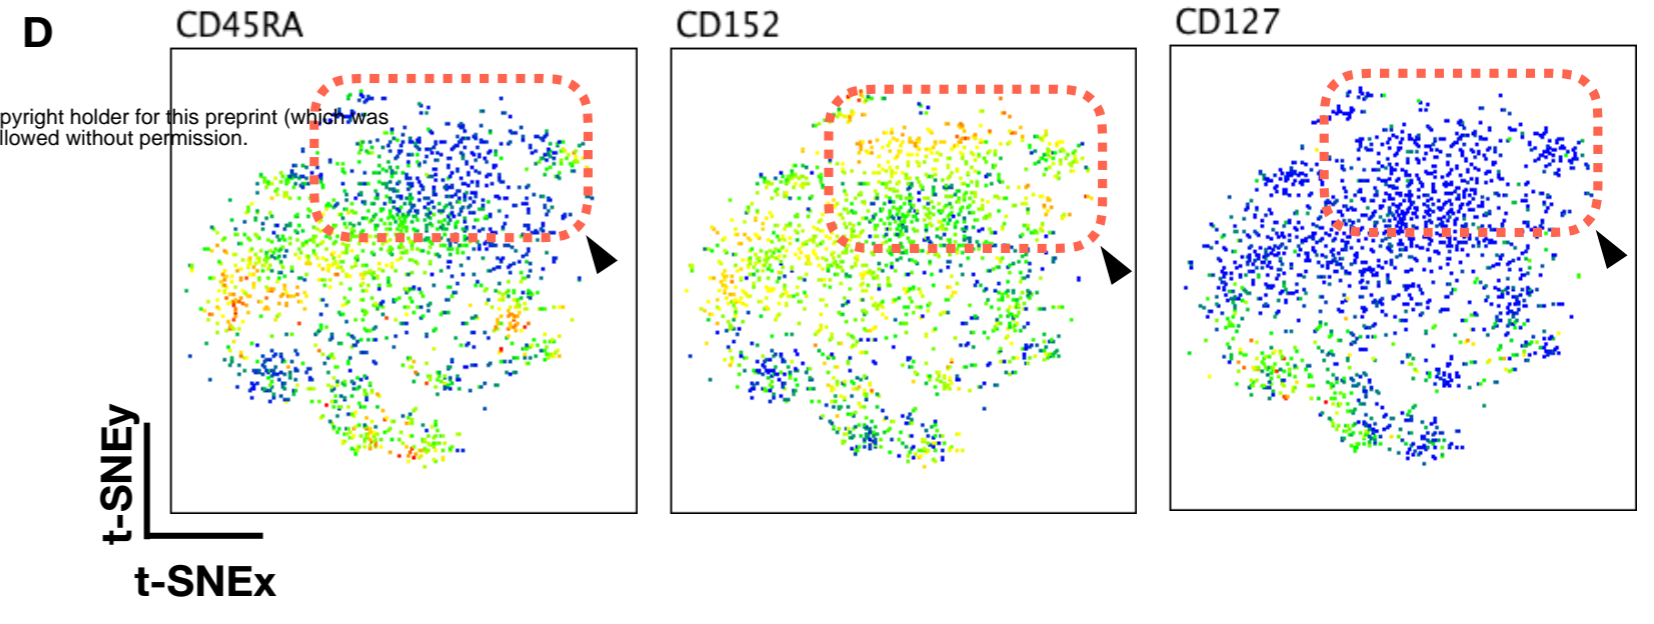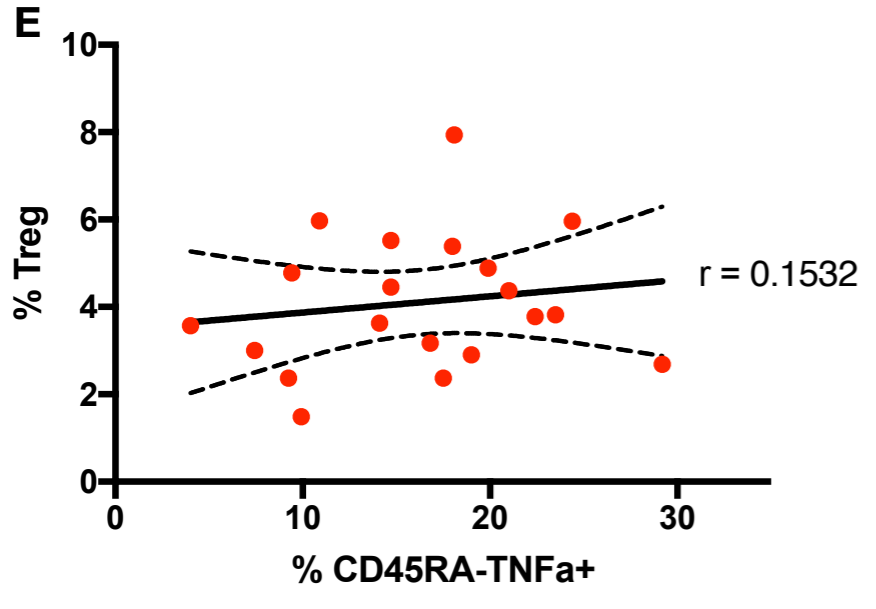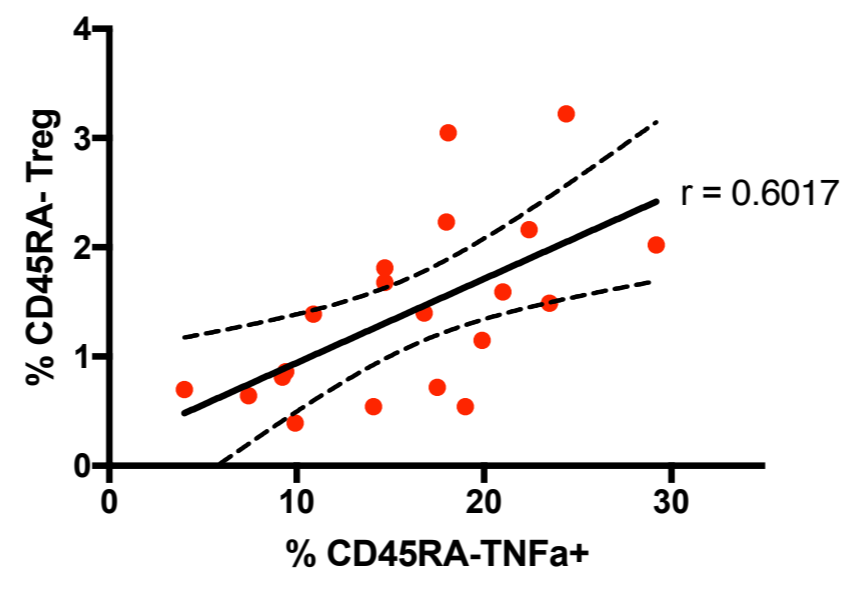

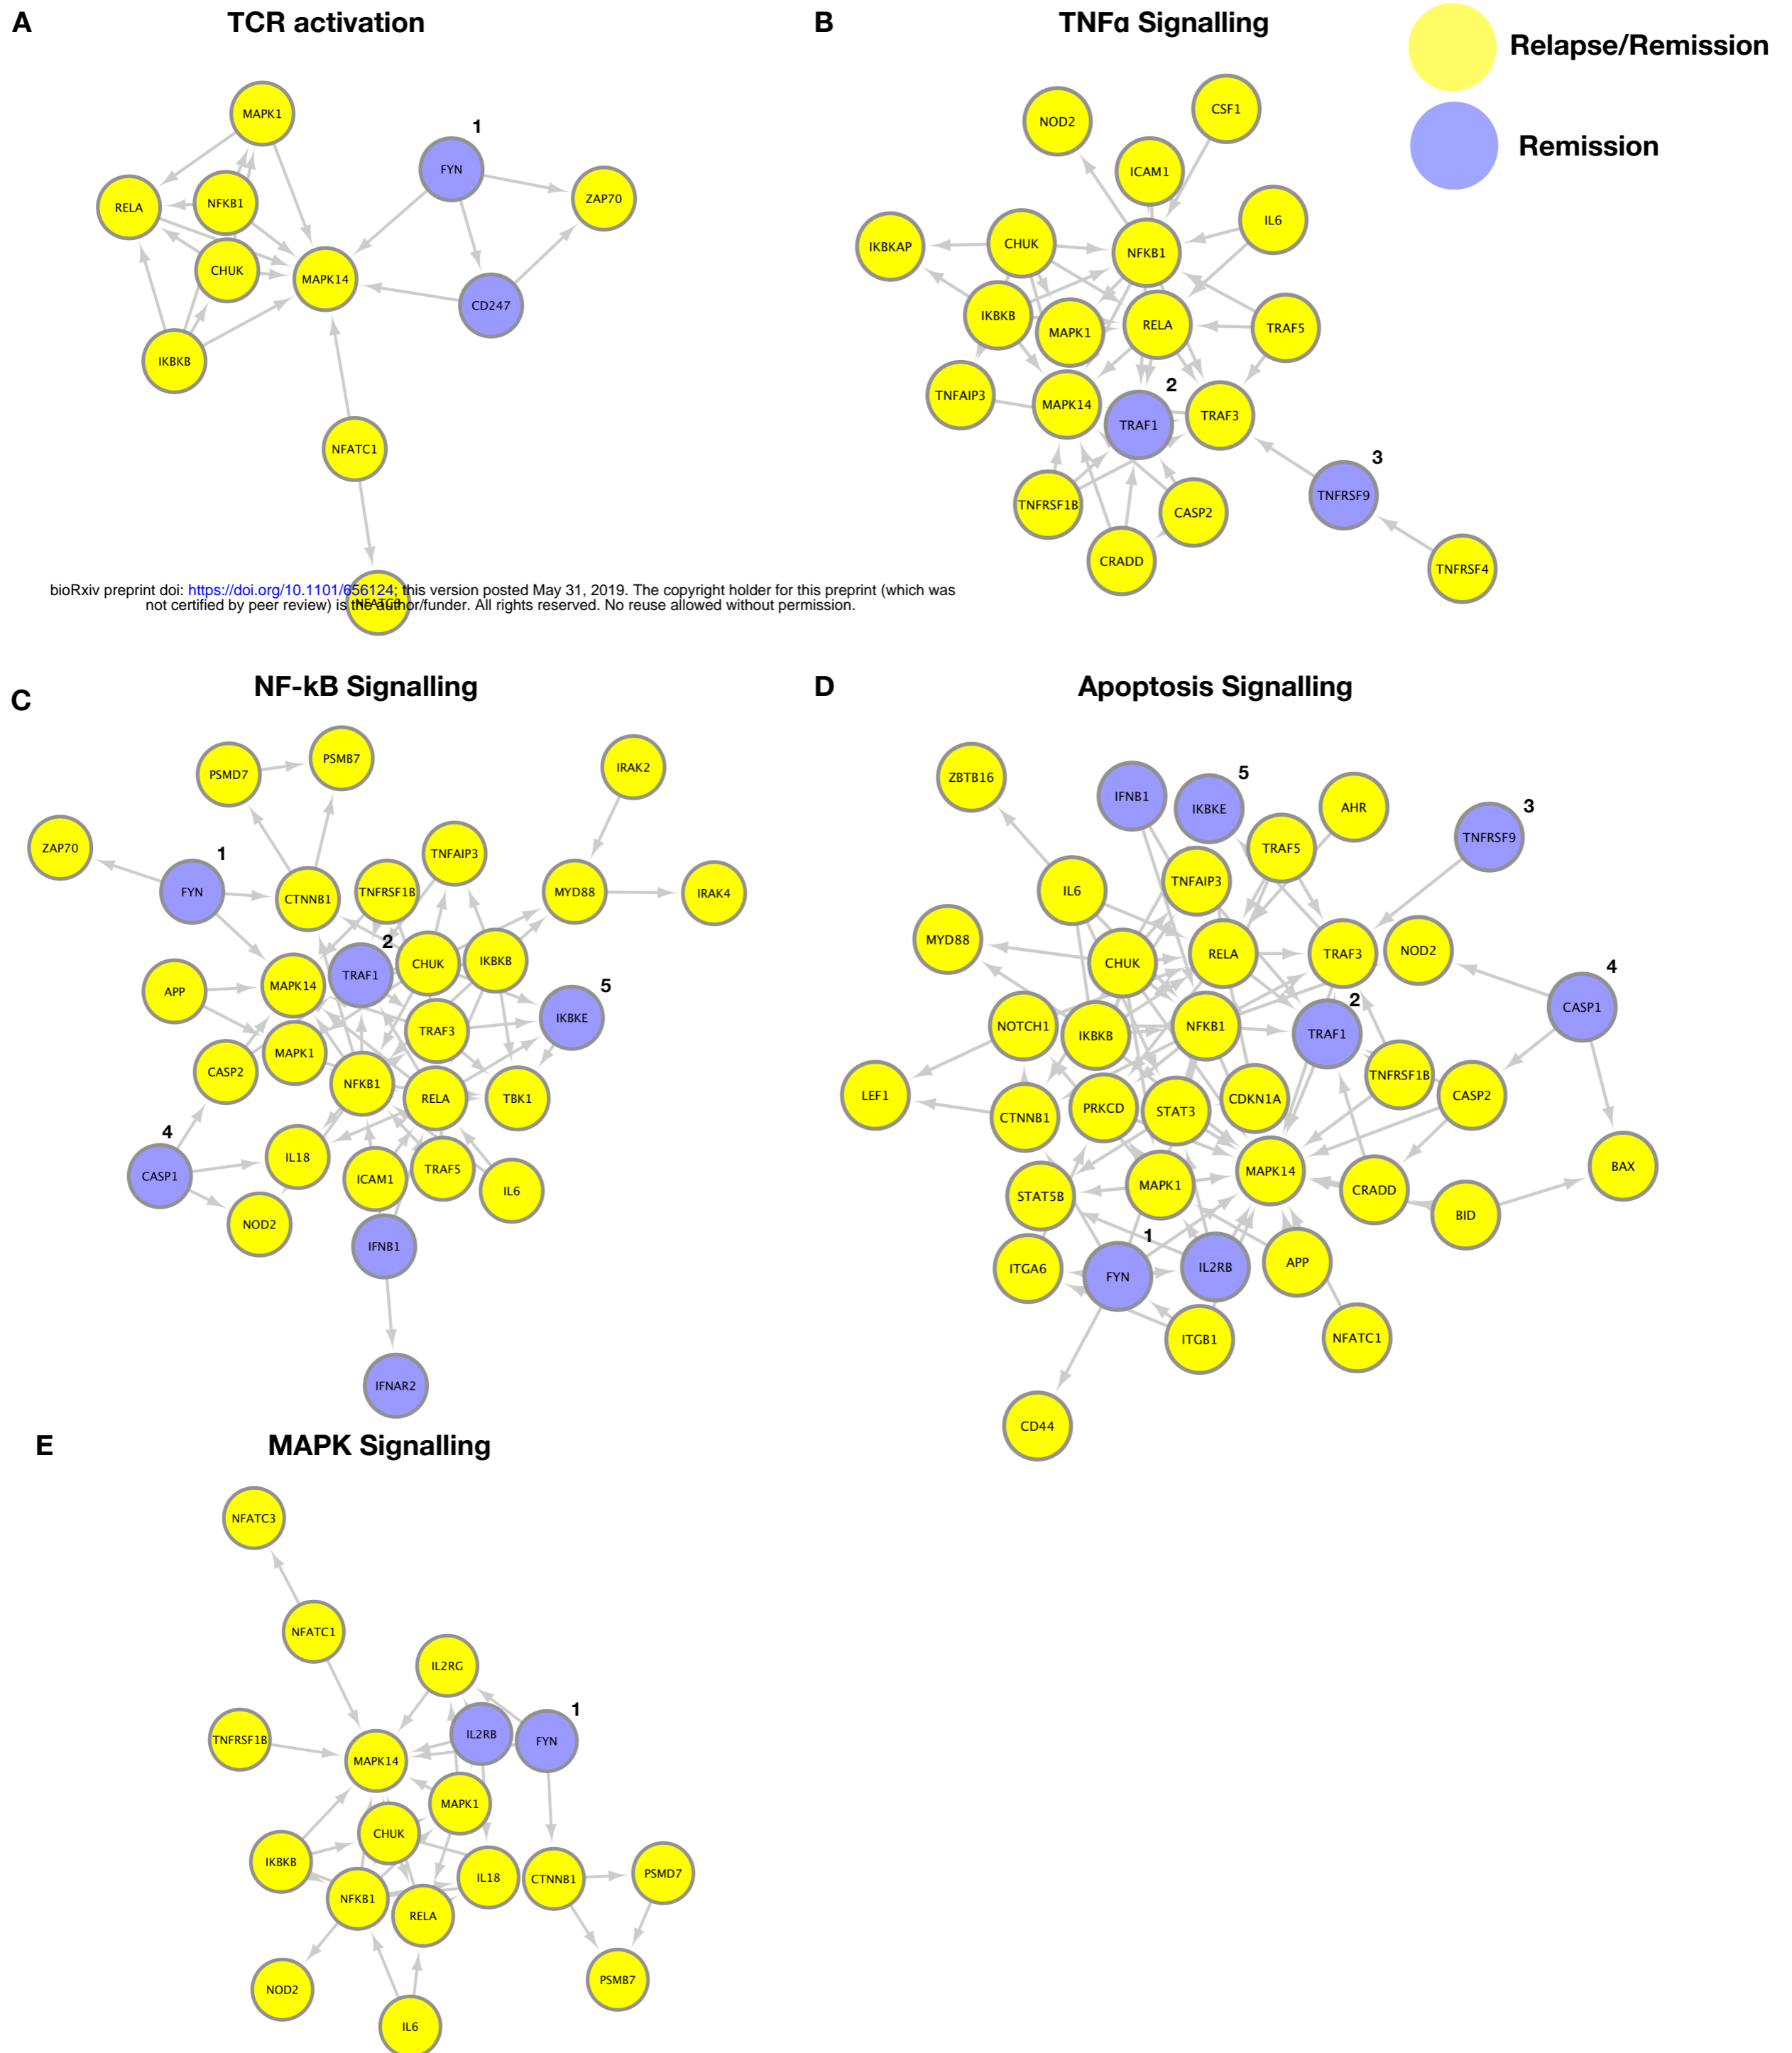

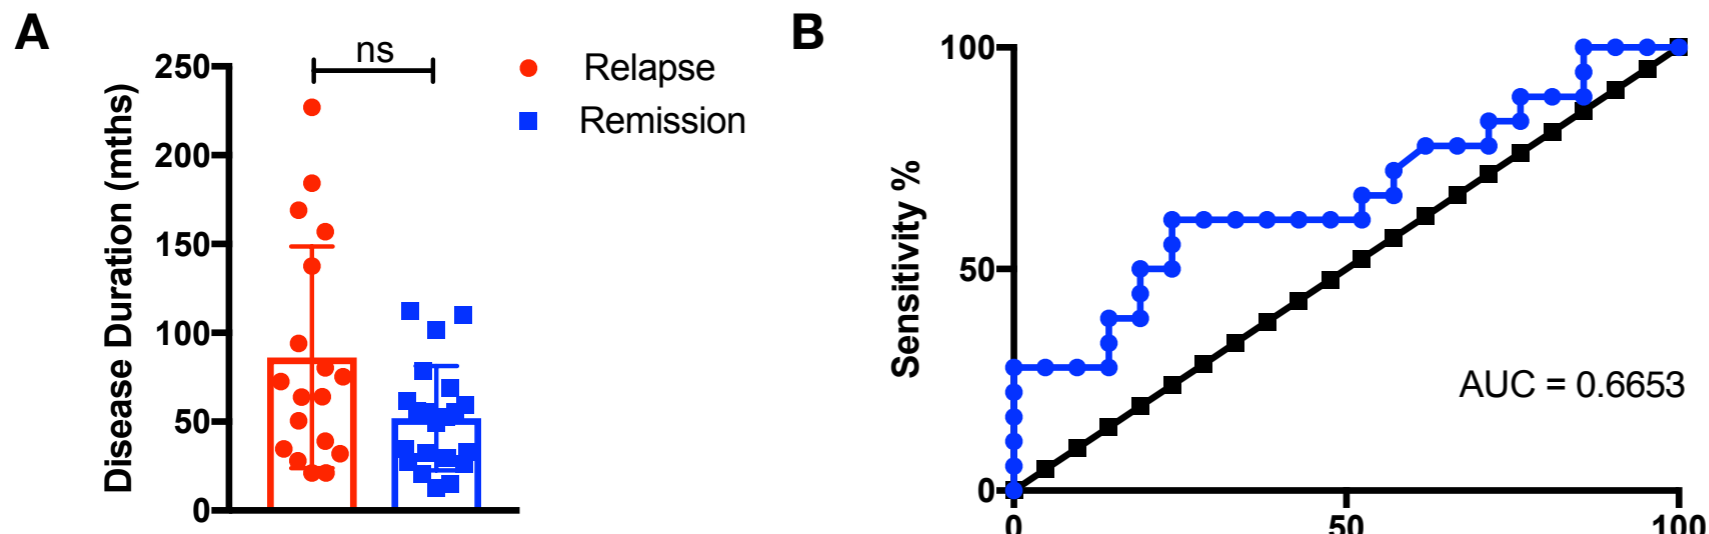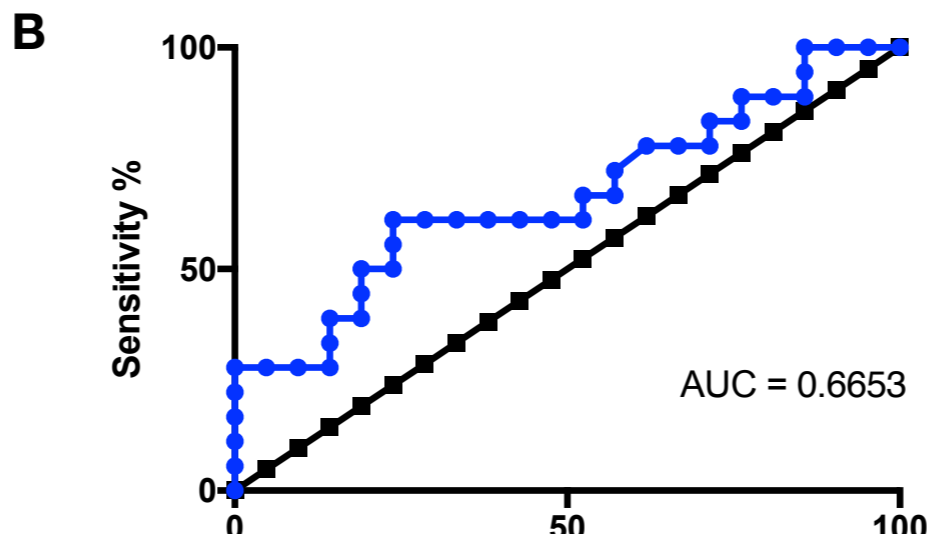

| Criterion | Sensitivity | Specificity |
|-----------|-------------|-------------|
| > 20.85   | 100%        | 14.29%      |
| > 62.65   | 61.11%      | 76.19%      |
| > 124.9   | 27.78%      | 100%        |

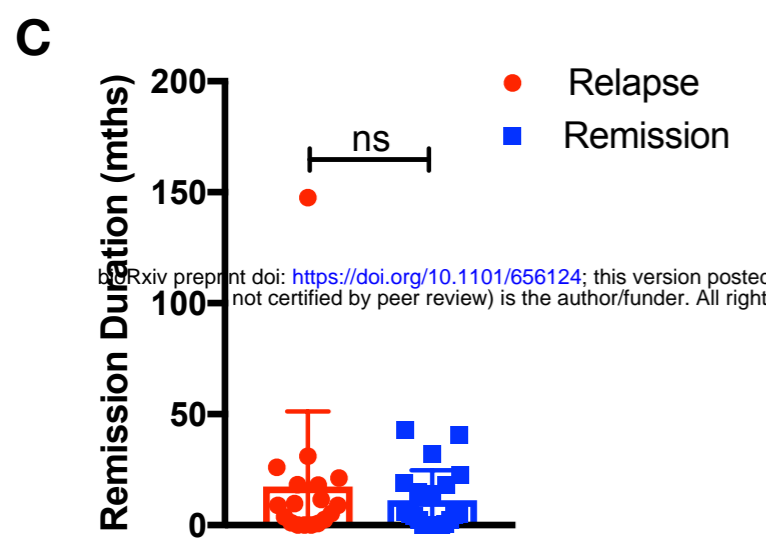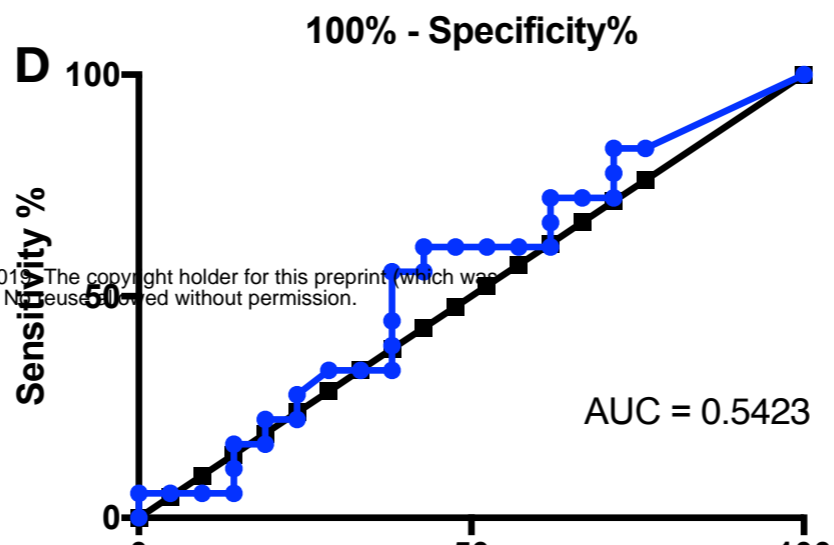

| Criterion | Sensitivity | Specificity |
|-----------|-------------|-------------|
| > 0.7     | 83.33%      | 28.57%      |
| > 5.25    | 61.11%      | 57.14%      |
| > 95.25   | 5.56%       | 100%        |

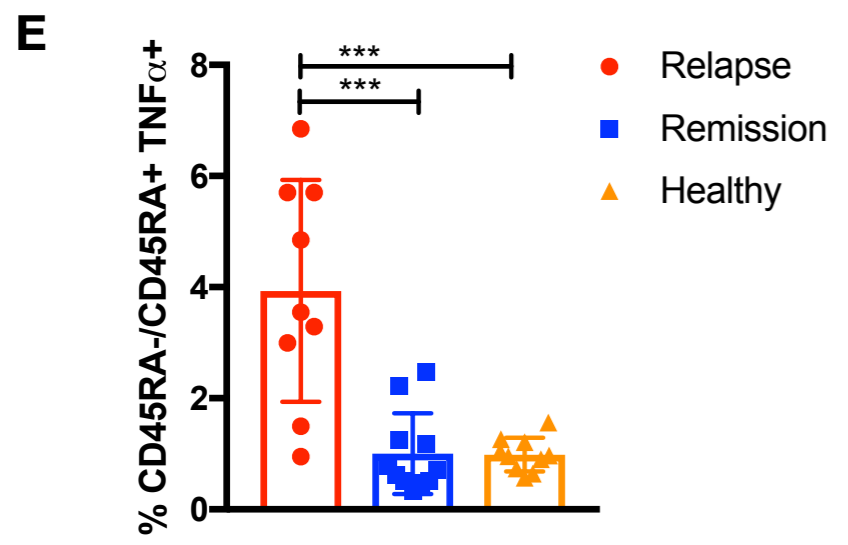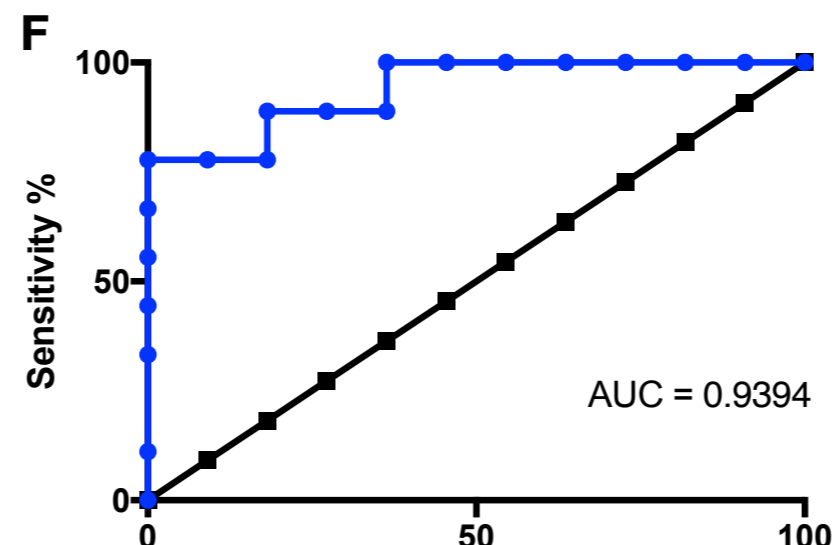

| Criterion | Sensitivity | Specificity |
|-----------|-------------|-------------|
| > 0.865   | 100%        | 63.64%      |
| > 1.37    | 88.89%      | 81.82%      |
| > 2.735   | 77.78%      | 100%        |

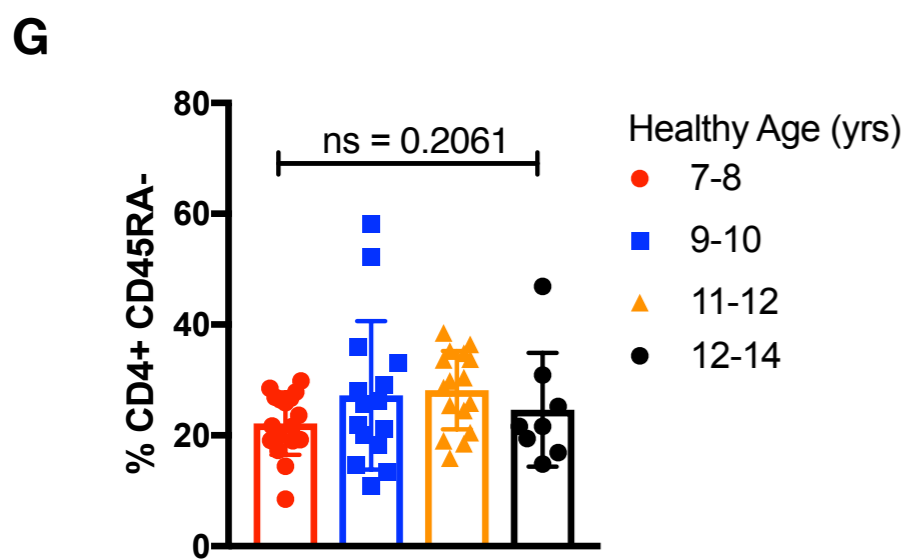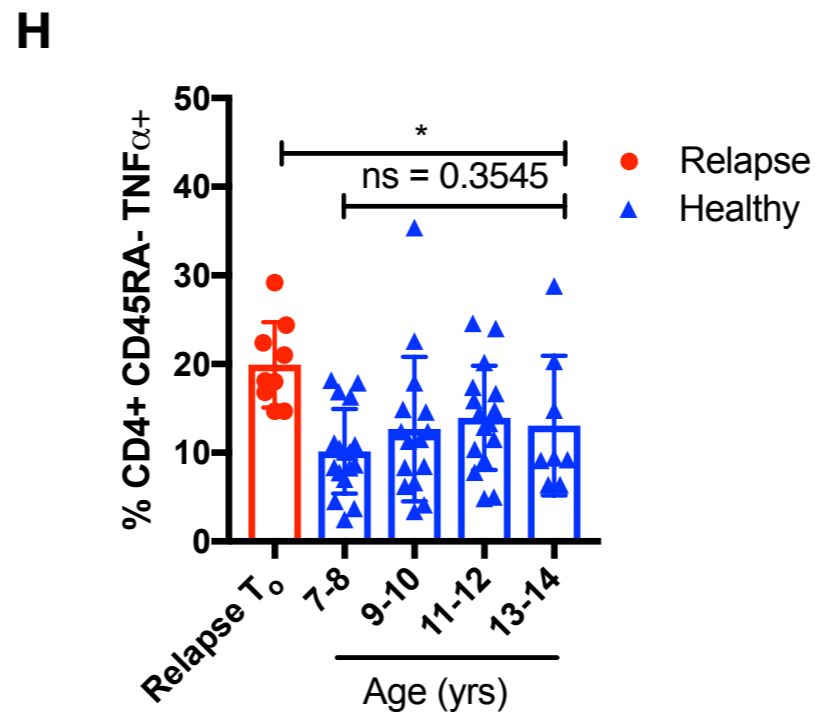

Source: https://www.biorxiv.org/content/10.1101/656124v1.full.pdf
